# Supplementary material
Source: PubMed Central journal article supplement (PMC6765235)
Supplement: pnas.1912006116.sapp.pdf [file pnas.1912006116.sapp.pdf]

# PNAS

[www.pnas.org](http://www.pnas.org)

Supplementary Information for

**Diversification of giant and large eukaryotic dsDNA viruses predated the origin of modern eukaryotes**

Julien Guglielmini, Anthony C Woo, Mart Krupovic, Patrick Forterre, Morgan Gaia

Corresponding authors:

Patrick Forterre

[patrick.forterre@pasteur.fr](mailto:patrick.forterre@pasteur.fr)

Morgan Gaia

[morgan.gaia@pasteur.fr](mailto:morgan.gaia@pasteur.fr)

**This PDF file includes:**

Supplementary discussions

Figures S1 to S17

Tables S1 to S3

SI References

**Other supplementary materials for this manuscript include the following:**

Additional data (<https://doi.org/10.5281/zenodo.3368642>)

## 1 **SI Discussions**

### 2 **Conservation of genes among NCLDV**

3           In order to determine a set of core genes that would both be informative and  
4 provide reliable markers for our analysis, we designed a Best Bidirectional BLAST-Hit  
5 (BBH)-based pipeline with manual curation and built a first dataset based on 96 NCLDV  
6 genomes (see Methods and SI Appendix, Table S1), representing every family and  
7 including some of the most recently identified viruses. Highly redundant genomes were  
8 removed to limit imbalance between families, reducing the dataset to 73 genomes. This  
9 step was necessary to avoid some genes to be considered as highly conserved by the  
10 algorithm when they are actually missing in several under-represented families but  
11 present in over-represented families (many highly-related strains). This analysis  
12 determined that 3 protein-coding genes were strictly conserved among the 73 selected  
13 NCLDV genomes. This finding was rather remarkable considering the number of viral  
14 genomes analysed, the observed divergences between NCLDVs and the common  
15 assumption that horizontal gene transfer plays a central role in the evolution of dsDNA  
16 viruses. Indeed, one usually expects to find fewer core genes when more genomes are  
17 included in phylogenomic analyses. However, if we compare our results to previous  
18 NCLDV genomic analyses, it is noteworthy that despite substantially increasing the  
19 number of genomes (especially from novel or under-represented families), the number of  
20 core genes did not really decrease. Indeed, in 2012, Yutin and Koonin (1) studied 45  
21 genomes and defined 5 genes strictly conserved in every NCLDV family: the DNA pol B,  
22 the primase, the VLTF3-like, the MCP, and the packaging ATPase. Only the two latter were  
23 not found in our strict core genes set, but this was only due to the inclusion in our dataset  
24 of genomes known to lack the MCP or ATPase (2–5). These two genes are otherwise  
25 present in every other NCLDV. Considering for both studies a relaxed definition of the

26 core genomes (presence in 92% of genomes), our results are compatible: the most  
27 conserved genes then include the RNAP-a and -b, TFIIS, the late transcription factor VLTF-  
28 2, and the disulfide (thiol) oxidoreductase of the Erv1/Alr family. Given that the core  
29 genome did not significantly change when using two different methodologies and after  
30 adding significantly more genomes, we postulate that these 10 genes represent the actual  
31 NCLDV core genome. Two genes of the relaxed core gene set (VLTF-2 and Erv1/Alr) were  
32 not included in our in-depth phylogenetic analyses because they were not matching other  
33 criteria fulfilled by the other relaxed core genes (slightly higher conservation for TFIIS  
34 and long proteins for the RNA polymerases). The final list of markers we selected for our  
35 study thus comprises 8 proteins: 6 are related to informational processes – genome’s  
36 expression and replication (DNA pol B, primase, VLTF3-like, TFIIS, RNAP-a, and RNAP-b)  
37 – and 2 to virion structure and morphogenesis (pATPase and MCP). While this list is  
38 rather short in comparison with the total content of NCLDV genomes, these markers were  
39 selected for investigating the backbone of their evolution. The many other genes might  
40 also contain valuable sources of information on that matter, and remain to be further  
41 investigated.

42         Interestingly, our analysis of separate core genes in each family reveals different  
43 levels of diversifications. For instance, the *Phycodnaviridae* (excluding Pandoraviruses  
44 and Mollivirus), with genomes encoding between 150 and 860 genes, only possess 10  
45 strict core genes. Similarly, the *Poxviridae* and one subset of the *Iridoviridae* (the  
46 *Alphairidovirinae*) each have 29 core genes, for genomes encoding 130 to 334 and 95 to  
47 239 genes, respectively. By contrast, *Marseilleviridae* share 289 core genes (genomes  
48 encoding 403 to 484 genes), and Pandoraviruses/*Mollivirus* – 112 (523 genes for  
49 *Mollivirus*; 1,497 and 2,541 genes for Pandoraviruses). *Mimiviridae* share 59 core genes  
50 (for 544 to 1,545 genes encoded in their genomes), while the *Mimiviridae*-related viruses

51 have 46 (for 326 to 512 genes in their genomes); together within the putative order  
52 “Megavirales” they would share 25 core genes. These discrepancies could reflect  
53 comparable biological constraints for viruses belonging to the same clade, or the level of  
54 represented diversity from the isolates/reconstructed genomes.

55

## 56 **Viral phylogenies**

57       Because of the divergence generally observed between homologous proteins from  
58 different viral families, building a viral phylogeny is not a trivial task. This holds true in  
59 the case of the NCLDVs, despite the presence of 3 strictly conserved protein-coding genes  
60 and 5 highly conserved genes. Notably, among these 8 core proteins, the two transcription  
61 factors (TFIIS and VLTF3-like) produced the least supported trees (trees in Additional  
62 data at <https://doi.org/10.5281/zenodo.3368642>); this was however not unexpected as  
63 they represent the shortest markers. In these two trees, several families were not  
64 monophyletic, with one or two taxa branching outside of well recognized families. In the  
65 trees obtained from the larger markers, some incongruences were also observed. In the  
66 primase phylogenetic tree, Cedratvirus A11 is notably branching next to the *Asfarviridae*,  
67 while *Heterosigma akashiwo* virus is branching outside – but next to – the  
68 *Phycodnaviridae*. The *Ascoviridae* are paraphyletic in the MCP tree, just as the  
69 *Phycodnaviridae*. The latter are also paraphyletic in the pATPase tree. In all our trees, the  
70 *Poxviridae* had long branches and were ambiguously located with varying positions. Not  
71 only their position seems difficult to confidently determine, but also their mere presence  
72 in datasets is a potential source of bias. Notably, their inclusion in the analyses often  
73 reduces the branch supports at most nodes. Their frequent grouping with the *Asfarviridae*  
74 (3/8 of the single protein trees) could hence result from an attraction with the clade  
75 displaying the second longest branch (trees in Additional data at

76 <https://doi.org/10.5281/zenodo.3368642>). Interestingly, when *Poxviridae* were  
77 included in the phylogenetic analysis based on 8 concatenated markers in the ML  
78 framework, they branched between the MAPI and PAM putative superclades (SI  
79 Appendix, Fig. S15), a position reminiscent of that of Polintoviruses with the concatenated  
80 structural proteins (SI Appendix, Fig. S5). This suggests that *Poxviridae* diverged from  
81 NCLDVs before the separation between these two superclades. However, this position can  
82 also be due to their long branches and one cannot exclude that *Poxviridae* also belong to  
83 one of them. One possibility is that *Poxviridae* have undergone an evolutionary history  
84 more complex than other NCLDV families, at least concerning the core proteins  
85 investigated herein. It is possible that they acquired their genes through several  
86 horizontal transfers from other viral families, just like they do with genes of eukaryotic  
87 origin (6–8). This could explain why *Poxviridae* have very long branches in all trees. The  
88 evolution of *Poxviridae*, as well as their position among NCLDVs, thus remains to be  
89 elucidated.

90 A similar situation was observed with *Aureococcus anophagefferens* virus. This  
91 virus is known to be hard to position with confidence. Moniruzzaman and colleagues  
92 suggested that this virus could be related to “Megavirales”, based on the core gene  
93 phylogenies and comparative genomic analyses (9). While indeed located close to  
94 *Mimiviridae* in 5 out of 8 of our individual protein trees, it was branching at various other  
95 positions for the 3 other markers (trees in Additional data at  
96 <https://doi.org/10.5281/zenodo.3368642>). Considering its long branch, we thus  
97 removed *Aureococcus anophagefferens* virus from the dataset. Removing both the  
98 *Poxviridae* and *Aureococcus anophagefferens* virus improved greatly the resolution of the  
99 single-protein trees, which were much better supported and more congruent, especially  
100 in terms of relationships between the viral families (SI Appendix, Fig. S1). This is

101 particularly noticeable when the trees are rooted between the MAPI and the PAM  
102 superclades. Despite the paraphyly of *Phydoonaviridae* in the TFIIS and MCP trees,  
103 comparative phylogenetic tests, based on all possible combinations of 6 out of 8 markers,  
104 did not detect any major incongruence between the different combinations of core  
105 proteins (SI Appendix, Table S2). These results warranted concatenation of the 8 marker  
106 genes to determine the global NCLDV phylogeny. We thus performed Bayesian inferences  
107 with the CAT-GTR model, designed to deal with site and sequence heterogeneities, and  
108 obtained chains that reached a stable and good convergence according to the software's  
109 manual (maxdiff <0.1). The very robust resulting tree had all nodes but two minor ones  
110 at maximum support (PP=1), and thus appears much more reliable than a tree we  
111 obtained with the same dataset but using the ML framework (SI Appendix, Fig. S16).

112 In parallel, we constructed a supertree based on the subtree prune-and-regraft  
113 (SPR) distances (see Methods; SI Appendix, Fig. S2). This method has been designed to  
114 help to recover the species tree despite the presence of transfers and is entirely  
115 independent of any concatenation since the reconstructed tree is directly based on the  
116 single-protein phylogenetic trees. Considering the transfers that occurred for the RNA  
117 polymerases, and the still possible presence of hidden conflicting signals, such an  
118 approach could indeed be useful. Both approaches, the Bayesian inferences and the SPR  
119 Supertree, produced strikingly identical phylogenetic trees, adding strong confidence in  
120 the obtained topology and again supporting the absence of conflicting signals within the  
121 core genes. This implies that these trees likely represent the vertical evolution of NCLDVs'  
122 core genes and that the informational proteins within it co-evolved with the markers  
123 involved in virion formation. We hence separately concatenated these two sets of  
124 proteins: the DNA polB, RNAP-a and -b, and the primase on one side (considering the  
125 previous results obtained in single-protein trees, we did not include the short and

126 possibly confusing VLTF3-like and TFIIS markers), and the MCP along with the pATPase  
127 on the other hand. In both trees (SI Appendix, Fig. S3 and S4), all NCLDV families were  
128 monophyletic, except for the *Iridoviridae* which were split by the *Ascoviridae* in the tree  
129 constructed from the concatenation of informational proteins (SI Appendix, Fig. S3). The  
130 two phylogenies had similar topologies, with the same clusters of NCLDV families as  
131 observed in the trees obtained from Bayesian inferences and SPR Supertree  
132 reconstruction (Fig. 1; SI Appendix, Fig. S2). Some positions within these clusters might  
133 be affected by differences between the two datasets: 2 of the 4 informational proteins are  
134 absent in all but one *Phycodnaviridae* genus, while the Pitho-like viruses lack the pATPase  
135 gene. The congruence between the two trees still supports the co-evolution of the  
136 informational markers with those involved in virion formation.

137

138         The robust tree we obtained (Fig. 1) calls for a reconsideration of taxonomy and  
139 nomenclature among the NCLDVs. This is particularly true for the *Asfarviridae*, initially  
140 comprising the *African swine fever* virus only but now including amoeba-infecting viruses.  
141 Similarly, the *Phycodnaviridae* clade groups very diverse marine viruses, infecting not  
142 only algae but also protists with pandoraviruses and mollivirus, raising questions about  
143 their taxonomic-level and their actual monophyly. One of the most robust clusters, but  
144 also one of the most confusing ones with regard to its nomenclature, corresponds to the  
145 *Mimiviridae* with a clade of related viruses infecting algae and referred to as the “extended  
146 *Mimiviridae*” (10) or “*Mesomimivirinae*” (11). We proposed herein to name this cluster  
147 the “*Megavirales*” order, since the vast majority of this cluster is currently represented by  
148 giant viruses. The term “*Megavirales*” has already been proposed with different  
149 definitions. For instance, Arlsan and colleagues (12) proposed a name “*Megaviridae*” to  
150 refer to the giant DNA viruses with genome sizes larger than 1 Mb. However, the latter

151 virus group corresponds to the previously created and officially recognized *Mimiviridae*  
152 family, and is thus unjustified (but still used in literature, albeit rarely). One year later,  
153 Coslon and colleagues (13) proposed to unify the families included in the NCLDV  
154 assemblage into the “Megavirales” order, on the basis of phylogenetic reconstructions and  
155 conserved features. This name has not been officially adopted though, and one could  
156 argue that most families among the NCLDVs do not encompass any truly giant viruses.  
157 The definition we propose herein somewhat matches the one previously described by  
158 Santini, Moniruzzaman, and their respective colleagues with the “Megaviridae” family (9,  
159 14), except that we raised it to the taxonomic rank of order, so as to remain consistent  
160 with the current ICTV classification comprising the *Mimiviridae* family.

161

## 162 **The DNA-dependent RNA polymerase**

163         The two largest subunits of DNA-dependent RNA polymerase (RNAP) are the  
164 largest universal markers and are present in all three cellular domains. As such, they are  
165 good candidates to study deep phylogenies such as the relationships between cells and  
166 NCLDVs. However, unlike Bacteria and Archaea that have a single polymerase processing  
167 every type of RNAs, all eukaryotes have three different RNA polymerases: one responsible  
168 for the synthesis of ribosomal RNA (except 5S rRNA) (RPA), another responsible for the  
169 synthesis of mRNA (RPB), and a third responsible for the synthesis of transfer RNA and  
170 small rRNA (RPC). To avoid confusion with the alphabetical names of the subunits, we  
171 used only the Roman numbers in this manuscript: RNAP-I, RNAP-II, and RNAP-III,  
172 respectively. The nomenclature of the RNAP subunits is especially confusing with the two  
173 largest subunits being respectively named  $\beta'$  and  $\beta$  in Bacteria, A and B in Archaea, 1 and  
174 2 in Eukaryotes, and alpha and beta in NCLDVs. For clarity, we decided to name all of them  
175 *a* and *b* here.



176           The second largest subunit, RNAP-b, has already been used in different  
177 controversial studies discussing whether NCLDV s correspond to a fourth domain of life  
178 (15–17). The first study, performed by Boyer and colleagues, displayed a RNAP-b  
179 phylogenetic tree in which the NCLDV s form a separate monophyletic clade close to  
180 Eukaryotes, prompting them to claim that NCLDV s should be considered as a fourth  
181 domain of life (based on other protein trees as well) (15). Their analyses of the RNAP-b  
182 comprised 272 aligned positions for 80 taxa. In these trees, Archaea were, however,  
183 paraphyletic (and underrepresented, with only 2 members of the phylum Euryarchaeota),  
184 many nodes were unsupported, and some phyla (especially in Bacteria and some  
185 NCLDV s) presented very long branches. In particular, *Candidatus* Korarchaeum  
186 cryptofilum was branching with Bacteria, suggesting the presence of a long branch  
187 attraction artefact (LBA). This study was criticized by Williams and colleagues, who  
188 suggested that the monophyly of NCLDV in the tree of Boyer and colleagues was probably  
189 due to the use of inappropriate models of protein evolution (JTT+CAT in maximum-  
190 likelihood, and WAG in Bayesian inferences) (16). From the same dataset (80 taxa and  
191 272 positions), Williams and colleagues performed a Bayesian inference with a model  
192 better suited to deal with heterogeneity (CAT60) and obtained a tree in which NCLDV s  
193 were no longer monophyletic. While one group was still branching between Archaea and  
194 Eukaryotes, the others were branching among Eukaryotes. Their tree nonetheless still  
195 displayed the paraphyly of underrepresented Archaea and low supports. *Ca.*  
196 Korarchaeum cryptofilum was this time branching next to Eukaryotes/NCLDV s, still  
197 suggesting an LBA. Furthermore, the tree contained many polytomies, and *Poxviridae* still  
198 presented a significantly longer branch. A few years later, Sharma and colleagues  
199 obtained again RNAP-b phylogenies similar to those obtained by Boyer and colleagues  
200 (with NCLDV monophyletic) using the same dataset enriched with new NCLDV sequences

201 (15, 18–20). However, they only performed maximum-likelihood analyses with the WAG  
202 model.

203         At the same time, Moreira and Lopez-Garcia proposed a re-analysis of the RNAP-b,  
204 and suggested that the previous studies were affected by poor taxon sampling (17). As a  
205 consequence, they added several new taxa, mostly eukaryotes. In parallel, they removed  
206 Bacteria and used Archaea as the outgroup. This allowed them to increase the number of  
207 aligned positions to 427 positions for 127 taxa. Their tree, performed in Bayesian  
208 framework with the CAT model, displays the Archaea as monophyletic, and the NCLDV's  
209 branching at various positions among the Eukaryotes. The authors concluded that the  
210 RNAP-b was acquired several times independently by NCLDV's after the emergence of  
211 modern eukaryotes, in agreement with their views that large DNA viruses are mainly  
212 pick-pockets of cellular genes that were rather recently acquired in the history of life (21).  
213 However, their tree is poorly supported (with many nodes having posterior probabilities  
214 values below 0.9). Furthermore, the resolution of the intra-domain phylogenies was not  
215 recovered, with for instance, Thaumarchaea and Euryarchaea branching within  
216 Crenarchaeota in Archaea. The eukaryotic part of the tree was not resolved, with many  
217 very short branches, possibly because it was strongly enriched in fast-evolving species  
218 (such as Cryptomonads). Several consensus NCLDV's families, such as the *Iridoviridae*,  
219 were not monophyletic. Finally, the viruses were never branching close to their known or  
220 supposed host, in contradiction with the "pick-pocket hypothesis".

221         A common feature for these analyses was the very limited number of positions for  
222 the RNAP-b. This protein is usually between 1,000 and 1,500 amino-acid long, yet the  
223 alignments were 272 positions-long for 80 sequences in the two first studies (15, 16) and  
224 up to 427 positions for 127 taxa in the third (17). The analysis of Sharma and colleagues  
225 in 2014 similarly included 420 positions for 99 sequences (including Bacteria) (18). This

226 indicates very stringent conditions for trimming the aligned sequences, an approach  
227 known for drastically reducing the signal carried by the protein, potentially up to the  
228 point where it cannot be differentiated from mere noise (22).

229         Notably, all these analyses included only one eukaryotic RNAP (mostly RNAP-II).  
230 In 2010, Lane and Darst included all of them with viral sequences in their analyses, yet  
231 their work was specifically oriented on the conservation of domains within the RNAP  
232 genes with a special focus on Bacteria (23). The only study on the NCLDV evolution that  
233 included the three eukaryotic RNAP was published in 2012 by Yutin and Koonin (1). They  
234 obtained phylogenetic trees very similar to our single subunit trees (the number of  
235 positions for each subunit was, however, not mentioned). They concluded that the  
236 ancestral NCLDV RNAP-a possibly derived from the eukaryotic RNAP-Ia before being  
237 replaced in *Mimiviridae* and *Asfarviridae* by eukaryotic RNAP-IIa and Ia, respectively. The  
238 second largest subunit, according to their results, could either display the NCLDVs as  
239 polyphyletic or monophyletic, with a more recent transfer of RNAP-IIb to the *Mimiviridae*.  
240 Their analyses, published in 2012, were however lacking some representatives that were  
241 isolated or described more recently, and the analyses were performed in the ML  
242 framework with limited options concerning the models. In addition, the *Poxviridae* were  
243 still included, and the results were essentially interpreted as a modular evolution, in the  
244 sense that genes were systematically analysed separately, congruence between trees was  
245 not considered, nor concatenations performed.

246         Our RNAP analyses were performed with considerations for the above-mentioned  
247 issues. We also performed topology tests (Approximately Unbiased tests) against trees  
248 constrained for the monophyly of cellular sequences or NCLDVs sequences. These  
249 alternative topologies were rejected, reinforcing the confidence in our RNAP phylogeny

250 in which the NCLDV assemblage is not monophyletic but nested between the different  
251 clades of eukaryotic RNAPs (Fig. 2).

252 Our results strongly suggest that the true eukaryotic ortholog of archaeal and  
253 bacterial RNAP is actually the eukaryotic RNAP-III. This is in line with the presence in  
254 Archaea of a homologue of the RNAP-III specific subunit, RPC34 (24, 25). Genes encoding  
255 these archaeal proteins (dubbed TFE- $\beta$ ) (25) were initially reported in Crenarchaeota,  
256 Thaumarchaeota and some Euryarchaeota (24) and later on in Asgard archaea (26).  
257 Interestingly, we failed to detect homologues of these proteins in NCLDVs. This suggests  
258 that this subunit was lost during the recruitment of the proto-eukaryotic RNAP by the  
259 ancestor of NCLDVs.

260 Our global RNAPs tree displays three clades of NCLDVs, corresponding to i) the  
261 monophyletic MAPI superclade, which is a sister group to the *Phycodnaviridae*, ii) the  
262 “Megavirales”, and iii) the *Asfarviridae*. Notably, the RNAP tree does not recover the  
263 monophyly of the PAM supergroup and the rooting between the PAM and MAPI obtained  
264 in the MCP-pATPase tree using Polintonviruses as an outgroup. Instead, while the relative  
265 positions of the NCLDV families are still matching the topology obtained in the absence of  
266 cellular sequences (SI Appendix, Fig. S11 and S12), the RNAP phylogeny suggests rooting  
267 the NCLDV tree between the *Asfarviridae* and all other NCLDVs, using eukaryotic RNAP-  
268 III/Archaea as outgroups. This suggests that the rooting of the NCLDV tree remains an  
269 open question. However, we noticed that the RNAP-based rooting suffers two  
270 weaknesses: i) one cannot exclude an attraction of the long branches of the  
271 *Asfarviridae*/RNAP-I assemblage by outgroup sequences (Archaea, RNAP-III), and ii) the  
272 absence of RNAP genes in most *Phycodnaviridae* could have influenced the position of the  
273 root. Thus, in our evolutionary scenario (Fig. 3), we used the rooting between the MAPI

274 and PAM supergroups, but further investigations will be required to confirm or disprove  
275 this particular rooting.

276         Considering the paraphyly of the PAM superclade in the viral/cellular RNAP tree,  
277 the position of the *Phycodnaviridae* as a sister group to the MAPI superclade could be due  
278 to insufficient signal due to their low representation for these specific markers, but could  
279 also suggest an early replacement of their RNAP by the ancestral MAPI variant. We hence  
280 performed a ML phylogenetic reconstruction of the concatenation of the two RNAP  
281 subunits from the NCLDVs and used the eukaryotic RNAP-III as an outgroup (SI Appendix,  
282 Fig. S17). In this tree, the *Phycodnaviridae* are branching before the MAPI and the  
283 “Megavirales”/*Asfarviridae* bipartitions. This branching pattern is not consistent with the  
284 transfer of RNAP from the MAPI superclade to the *Phycodnaviridae*; nonetheless, the  
285 *Phycodnaviridae* are not branching with the other PAM families either. It is thus possible  
286 that this virus family indeed acquired a NCLDV-like RNAP complex from a different  
287 currently unknown source more closely related to the MAPI superclade. However, the  
288 most parsimonious scenario fits with our hypothesis depicted in Fig. 3, which posits the  
289 emergence of the *Phycodnaviridae* shortly after the separation between the MAPI and the  
290 PAM superclades. The RNAP of the “Megavirales”/*Asfarviridae* common ancestor has  
291 followed a specific evolutionary trajectory, whereas the *Phycodnaviridae* retained a RNAP  
292 complex more similar to the NCLDV and MAPI ancestral variants. It should be noted that,  
293 at the moment, alternative scenarios for the origin of the *Phycodnaviridae* RNAP cannot  
294 be ruled out with confidence. Furthermore, the absence of this complex in all genera but  
295 the *Coccolithovirus* genus could suggest a specific evolutionary pathway. Altogether, their  
296 low representation in the RNAP phylogeny calls for caution when interpreting their  
297 position, and further data would be needed to resolve this uncertainty.

298           The concatenated RNAP-subunits tree, along with the trees obtained through  
299 consensus bootstrap and ancestral sequence reconstruction (SI Appendix, Fig. S13),  
300 strongly support the relationships between the eukaryotic RNAP-I and -II with the  
301 *Asfarviridae* and the “Megavirales”, respectively. If the bipartition corresponding to the  
302 MAPI superclade is still strongly supported in both the two single-subunit phylogenetic  
303 trees, these latter offered more contrasted information regarding the relationships  
304 between the cellular and viral RNAP-subunits. Indeed, the RNAP-I and -II are sister clades  
305 to *Asfarviridae* and “Megavirales”, respectively, in the *a*-subunit tree (SI Appendix, Fig.  
306 S8), whereas the RNAP-II alone is a sister group to a clade encompassing both *Asfarviridae*  
307 and “Megavirales” (the former being nested the latter) in the *b*-subunit tree. In this tree,  
308 the *b*-subunit of the eukaryotic RNAP-I is branching with the RNAP-III.

309           Our results strongly suggest that horizontal transfers occurred for the largest  
310 RNAP subunit (RNAP-a) between (i) “Megavirales” and eukaryotic RNAP-II, and (ii)  
311 *Asfarviridae* and eukaryotic RNAP-I. The second largest subunit, RNAP-b, was also  
312 horizontally transferred between eukaryotic RNAP-II and a clade including both  
313 “Megavirales” and *Asfarviridae*. It is possible that the two subunits were simultaneously  
314 transferred between the proto-eukaryotes and the common ancestor of “Megavirales”  
315 and *Asfarviridae* before the largest subunit was later again transferred between  
316 *Asfarviridae* and cells. Alternatively, it is possible that the RNAP-a and -b were transferred  
317 separately from the beginning, but this seems less likely considering the multimeric  
318 nature of RNAPs. Interestingly, the RNAP trees are fully compatible with the concatenated  
319 markers trees. The transfer of RNAP-b between proto-eukaryotes and a clade grouping  
320 *Asfarviridae* and “Megavirales”, but not with *Phycodnaviridae*, is coherent with the  
321 Bayesian inference (CAT-GTR model) (Fig. 1) and the SPR supertree obtained with the

322 concatenated markers and showing the sisterhood of “Megavirales” and *Asfarviridae* (SI  
323 Appendix, Fig. S2).

324         Importantly, the comparative phylogenetic test we performed for the markers  
325 suggested a strong congruence between the NCLDV tree topologies of every possible  
326 combination of 6 markers out of 8, hence including a concatenation lacking the two RNAP  
327 subunits (that otherwise correspond to 47% of the positions in the total alignment). This  
328 shows that the signal corresponding to the global concatenation is not only carried by the  
329 two RNAP subunits (that would have oriented the final topology toward their own.) but  
330 also by the other markers that were not subject to the transfers. This strongly suggests  
331 that the core genes were vertically inherited in all modern NCLDV families. In other  
332 words, the obvious important horizontal exchanges that occurred for RNAP-a and -b  
333 apparently did not perturb the signal likely to represent the NCLDV vertical evolution,  
334 and the RNAP trees were still congruent with the other concatenations. Notably, a similar  
335 topology is obtained with all the markers, with and without the RNAP genes (Fig. 1 and SI  
336 Appendix, Fig. S10, respectively), and with the viral RNAP genes only (SI Appendix, Fig.  
337 S11). Despite these transfer events involving two major clades of NCLDVs, the topology of  
338 the concatenated RNAP-subunits tree still matches the topology of NCLDVs from most  
339 trees in our study, as shown in SI Appendix, Fig. S12. Considering the proportion of  
340 positions corresponding to the RNAP genes in the concatenation, major cell-to-virus  
341 transfers in these two markers would have likely impacted the topology of NCLDVs. The  
342 absence of substantial impact on the NCLDV tree topology, even from the position of  
343 *Asfarviridae*, seems unlikely in the events of transfers from cells to viruses as proposed by  
344 Yutin and Koonin (1). On the contrary, this strongly suggests that the transfers of RNAPs  
345 between cells and viruses were oriented from the latter to the former. This would also

346 explain why the RPC34 subunit, lost in NCLDVs, is not associated with eukaryotic RNAP-I  
347 and II.

348 In addition, considering the two main alternative scenarios involving transfers of  
349 the eukaryotic RNAP-I and -II to the *Asfarviridae* and the “Megavirales”, replacing their  
350 ancestral NCLDV RNAP more alike modern eukaryotic RNAP-III, would have likely led to  
351 different topologies for the RNAP phylogenetic trees (SI Appendix, Fig. S14). If the  
352 eukaryotic RNAP-I and -II emerged by duplication events before the first transfer of RNAP  
353 to the ancestor of NCLDVs, one could expect the two large subunits to carry a congruent  
354 signal for a clade grouping the eukaryotic RNAP-I and -II with the *Asfarviridae* and the  
355 “Megavirales”, and for another clade with the eukaryotic RNAP-III and the  
356 *Phycodnaviridae* and the MAPI putative superclade. On the opposite, a first transfer to the  
357 ancestor of NCLDVs occurring before the emergence by duplication of the eukaryotic  
358 RNAP-I and -II would have likely induce a congruent signal in the two subunits for a clade  
359 encompassing the three eukaryotic RNAPs with the *Asfarviridae* and the “Megavirales”,  
360 and another clade containing the *Phycodnaviridae* and the MAPI putative superclade.  
361 None of these clades were observed in our RNAP phylogenies, adding more credit to our  
362 hypothetical scenario for the transfers of RNAPs.

363

## 364 **Evolution of NCLDVs**

365 Our results, displaying a robust phylogeny of NCLDVs, highlight particular points  
366 about their evolution that had been debated. Notably, with Pandoraviruses related to  
367 *Phycodnaviridae* and giant *Mimiviridae* encompassed within the “Megavirales” order with  
368 smaller related viruses, it appears that gigantism in viral genomes was not a unique event,  
369 but occurred at least twice independently within the PAM superclade. In addition,  
370 *Orpheovirus*, a member of the Pitho-like group in the MAPI superclade, also exhibits a



371 giant genome at odds compared to related viruses such as *Cedratvirus* and *Pithovirus*,  
372 which still produce giant particles but encapsidate smaller genomes. Even though more  
373 genomes/viruses belonging to this family are necessary to understand the directionality  
374 of evolution and extent of its actual diversity, the giant genome of Orpheovirus suggests  
375 that the switch toward the accumulation of genes also occurred independently in the  
376 Pitho-like virus lineage. This is in contradiction with the hypotheses advocating a giant  
377 cellular or viral ancestor of NCLDVs that evolved through parasitic reduction (27, 28).  
378 This scenario would indeed involve the parallel reduction in many different viral families  
379 and sub-families from a giant NCLDV ancestor, or potentially a giant PRD1-Adenovirus  
380 lineage ancestor, and would thus be less parsimonious given that many viruses of this  
381 lineage infect bacteria and archaea with comparatively small genomes and cell sizes. In  
382 contrast, our results favour models in which NCLDV genomes evolved from a smaller  
383 ancestor by successive steps of genome reduction and expansion (29, 30). Genome  
384 expansion in giant viruses could be related to host-virus interactions in the context of  
385 hosts evolving themselves toward gigantism, a situation favouring exchanges of genetic  
386 material, gene family expansion and *de novo* emergences of viral genes, as hypothesized  
387 for some years (31, 32) and demonstrated in Pandoraviruses more recently (33). Up to  
388 now, all giant viruses have been isolated in amoeba (but not all viruses isolated in  
389 amoebas are giant), and even if this corresponds to a methodological bias and primary  
390 hosts are still essentially unknown, it is reasonable to consider that these viruses  
391 naturally infect phagotrophic organisms where similar genetic dynamics are possible.  
392 Additional representatives from different NCLDV families and studies on virus-host  
393 interactions are necessary to unveil the prerequisite conditions for a virus to become  
394 giant.

395

396           Altogether, our different results prompted us to elaborate a putative scenario of  
397 the NCLDVs evolution compatible with our observations (Fig. 3). We hypothesize that the  
398 smaller ancestor of NCLDVs acquired an RNA polymerase complex from a proto-  
399 eukaryotic host soon after the divergence of the latter from Archaea. This ancestral  
400 eukaryotic polymerase corresponds to modern RNAP-III, the actual ortholog of archaeal  
401 and bacterial RNAPs, and was able to switch its transcription toward coding or non-  
402 coding RNAs. Later on, this lineage of ancestral NCLDV viruses split into two groups, the  
403 MAPI and the PAM superclades. From the MAPI superclade then emerged different  
404 modern families, the *Marseilleviridae*, Pitho-like viruses, *Iridoviridae*, and later  
405 *Ascoviridae*, without any major transfers involving the core genes analysed in our study.  
406 On the other side, the PAM superclade first divided into proto-*Phycodnaviridae* and the  
407 common ancestor of the “Megavirales” and *Asfarviridae*. Proto-eukaryotes acquired from  
408 this latter group a new RNAP complex (at least the two largest subunits) that was already  
409 or subsequently became specialized towards the transcription of mRNA (RNAP-II). After  
410 the emergence of the specific *Asfarviridae* and “Megavirales” clades, the largest subunit of  
411 the new proto-eukaryotic RNAP (RNAP-I) that potentially originated by a duplication  
412 event from RNAP-III, was transferred between the *Asfarviridae* and the proto-eukaryotes.

413           Regardless of the hypothetical scenario considered for the orientation of the  
414 transfers, they occurred between NCLDVs and proto-eukaryotes, and the diversification  
415 of NCLDVs predated that of modern eukaryotes.

## Supplementary Legends

- Fig. S1.** Maximum likelihood (ML) single-protein trees of the 8 core genes from the NCLDVs after removal of the *Poxviridae* and of *Aureococcus anophagefferens* virus.
- Fig. S2.** Supertree of the 8 core proteins from the NCLDVs.
- Fig. S3.** Maximum likelihood (ML) phylogenetic tree of the concatenated informational proteins from NCLDVs.
- Fig. S4.** Maximum likelihood (ML) phylogenetic tree of the concatenated structural proteins from NCLDVs.
- Fig. S5.** Relationships between Polintoviruses and NCLDVs.
- Fig. S6.** Maximum likelihood (ML) phylogenetic tree of the concatenated two largest RNA polymerase subunits from Bacteria, Archaea, and Eukaryotes, including the 3 eukaryotic polymerases.
- Fig. S7.** Maximum likelihood (ML) phylogenetic tree of the concatenated two largest RNA polymerase subunits from Bacteria, Archaea, Eukaryotes, and NCLDVs.
- Fig. S8.** Maximum likelihood (ML) single-protein trees of the two largest RNA polymerase subunits from Archaea, Eukaryotes, and NCLDVs.
- Fig. S9.** Maximum likelihood (ML) phylogenetic tree of the concatenated two largest RNA polymerase subunits from Archaea, Eukaryotes, and NCLDVs.
- Fig. S10.** Maximum likelihood (ML) phylogenetic tree of the concatenation of all core proteins but the two RNAP subunits from NCLDVs.
- Fig. S11.** Maximum likelihood (ML) phylogenetic tree of the concatenated two largest RNA polymerase subunits from NCLDVs.
- Fig. S12.** Schematic representation of the congruence in NCLDV topologies obtained before and after the inclusion of cellular sequences in the concatenated RNAP-subunits tree.
- Fig. S13.** Phylogenetic trees of the concatenated two largest RNA polymerase subunits from Archaea, Eukaryotes, and NCLDVs, obtained through consensus bootstrap reconstruction (left) and maximum likelihood (ML) with ancestral sequences reconstructed (right).
- Fig. S14.** Schematic representations of two alternative scenarios for the transfers of RNAPs from cells to viruses with the congruent signals expected from the two subunits.
- Fig. S15.** Maximum likelihood (ML) phylogenetic tree of the concatenated 8 core genes from the NCLDVs, including *Poxviridae*.
- Fig. S16.** Maximum likelihood (ML) phylogenetic tree of the concatenated 8 core genes from the NCLDVs.
- Fig. S17.** Maximum likelihood (ML) phylogenetic tree of the concatenated two largest RNA polymerase subunits from the NCLDVs and the eukaryotic RNAP-III.

**Table S1.** List and access numbers of NCLDV genomes included in this study.

**Table S2.** Results of the comparative phylogenetic analyses (congruence test), based on the presence/absence of reference features in the ML phylogenetic trees of every possible concatenations of 6 out of 8 markers (systematically referred by the two missing genes).

**Table S3.** List and taxon IDs of the cellular taxa used in this study.

Not included in SI Appendix:

**Additional data.** Sequence and tree files, and table listing the core genes and their access numbers among the NCLDV families (accessible <https://doi.org/10.5281/zenodo.3368642>).

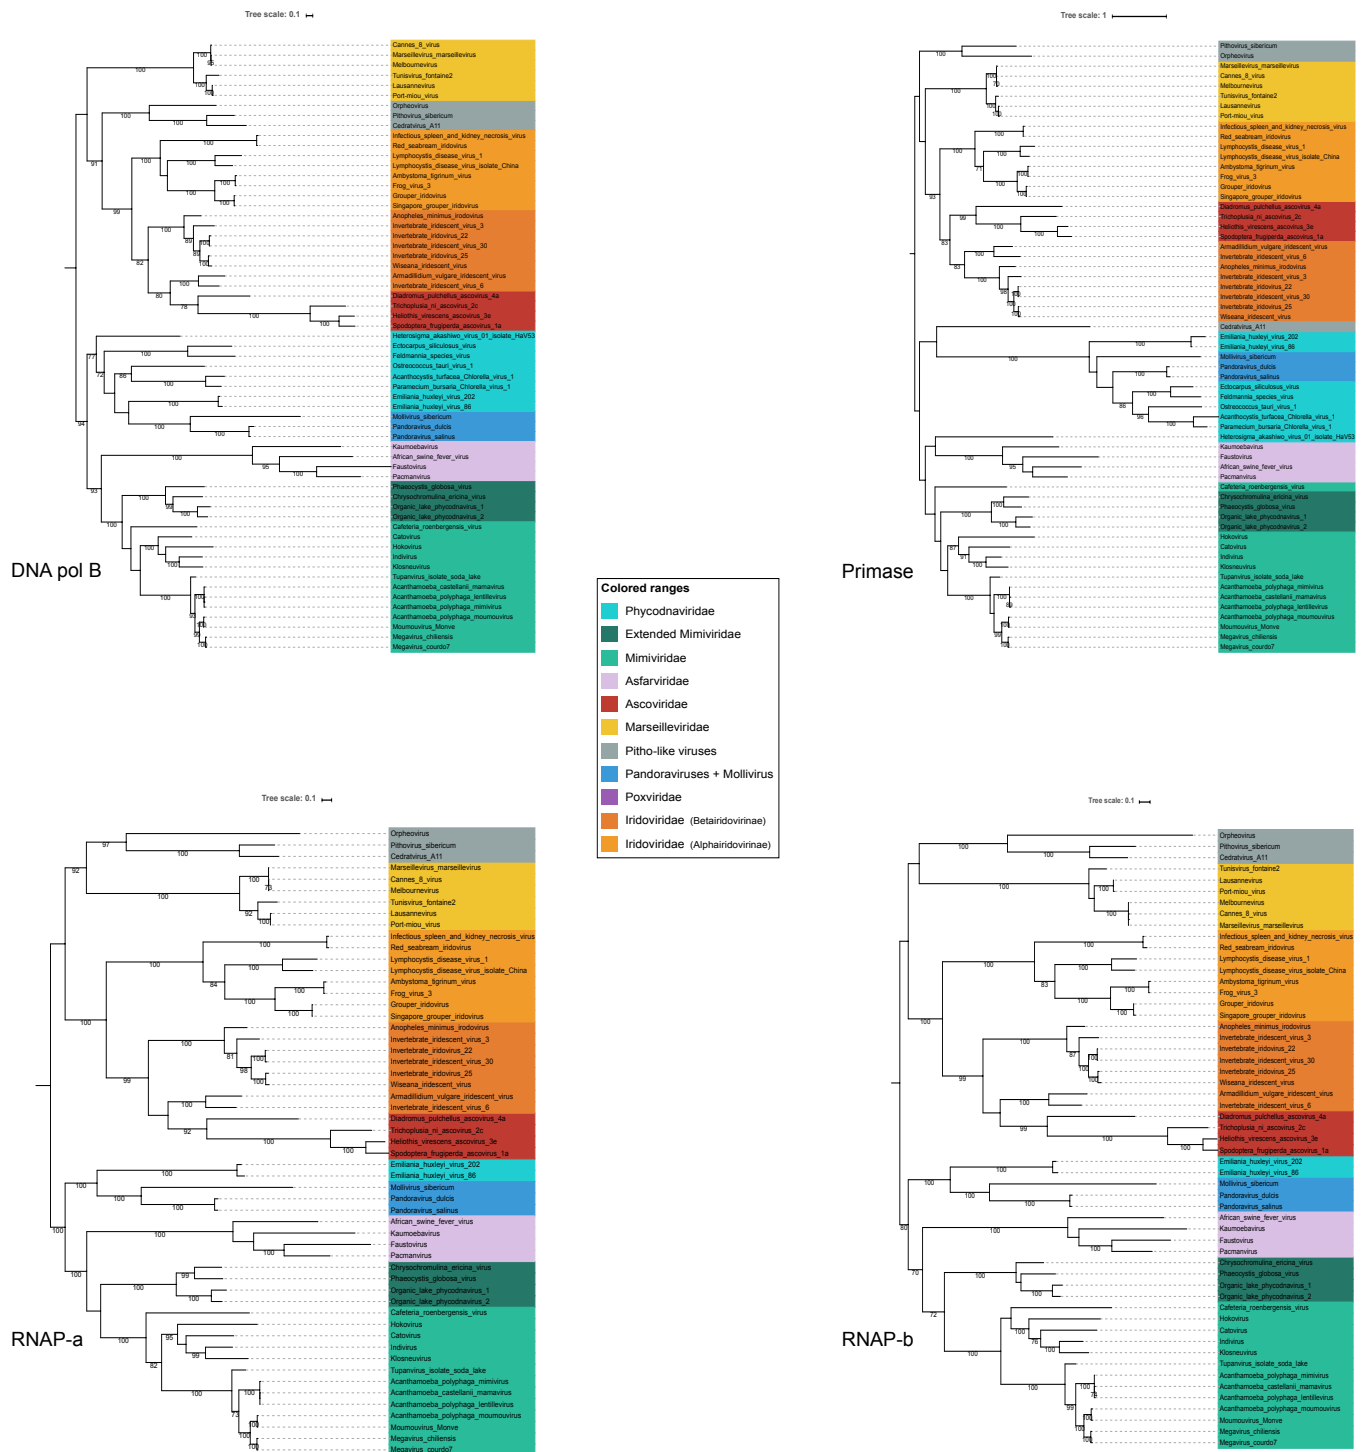

**Fig. S1. Maximum likelihood (ML) single-protein trees of the 8 core genes from the NCLDVs after removal of the *Poxviridae* and of *Aureococcus anophagefferens* virus.** The scale-bars indicate the average number of substitutions per site. Values on branches represent support calculated by nonparametric bootstrap; only supports superior to 70% are shown. The trees are rooted between the PAM and the MAPI putative superclades.

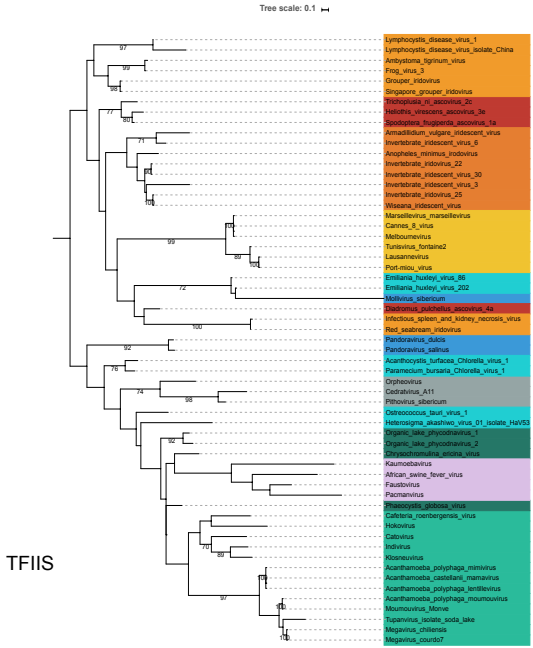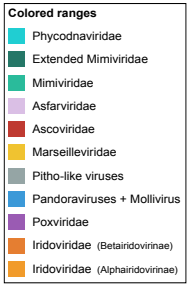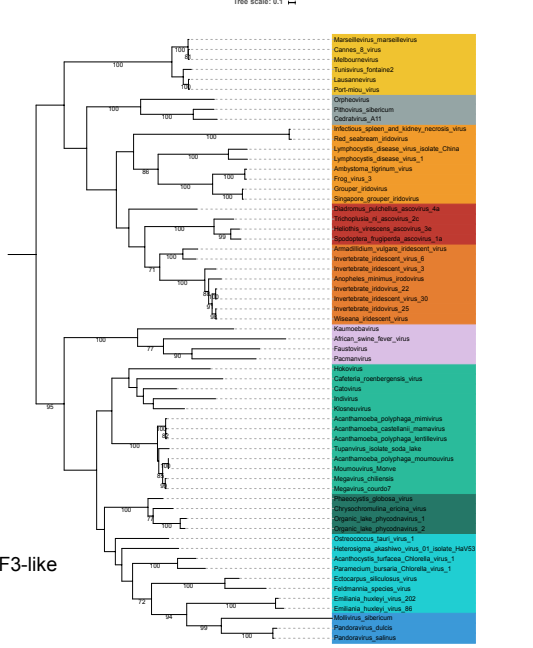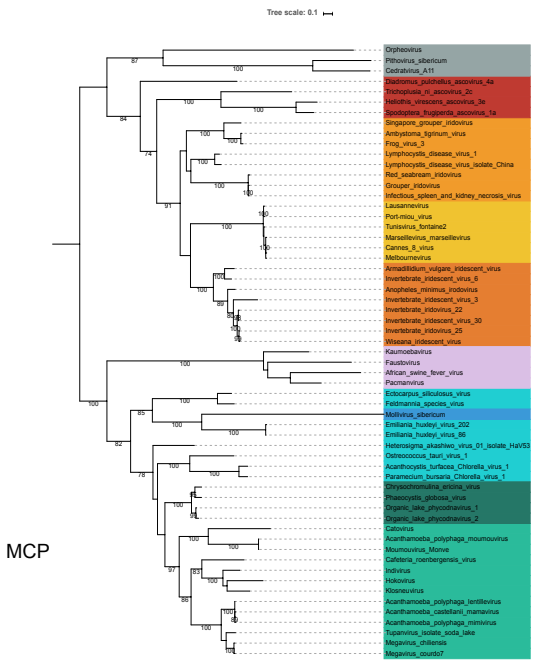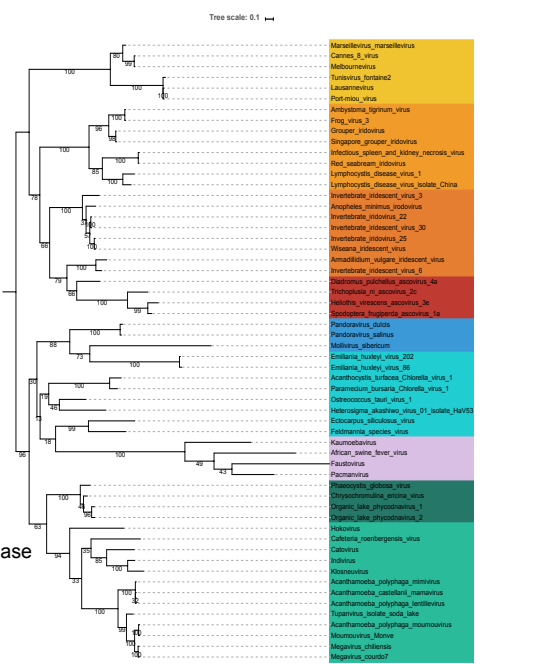

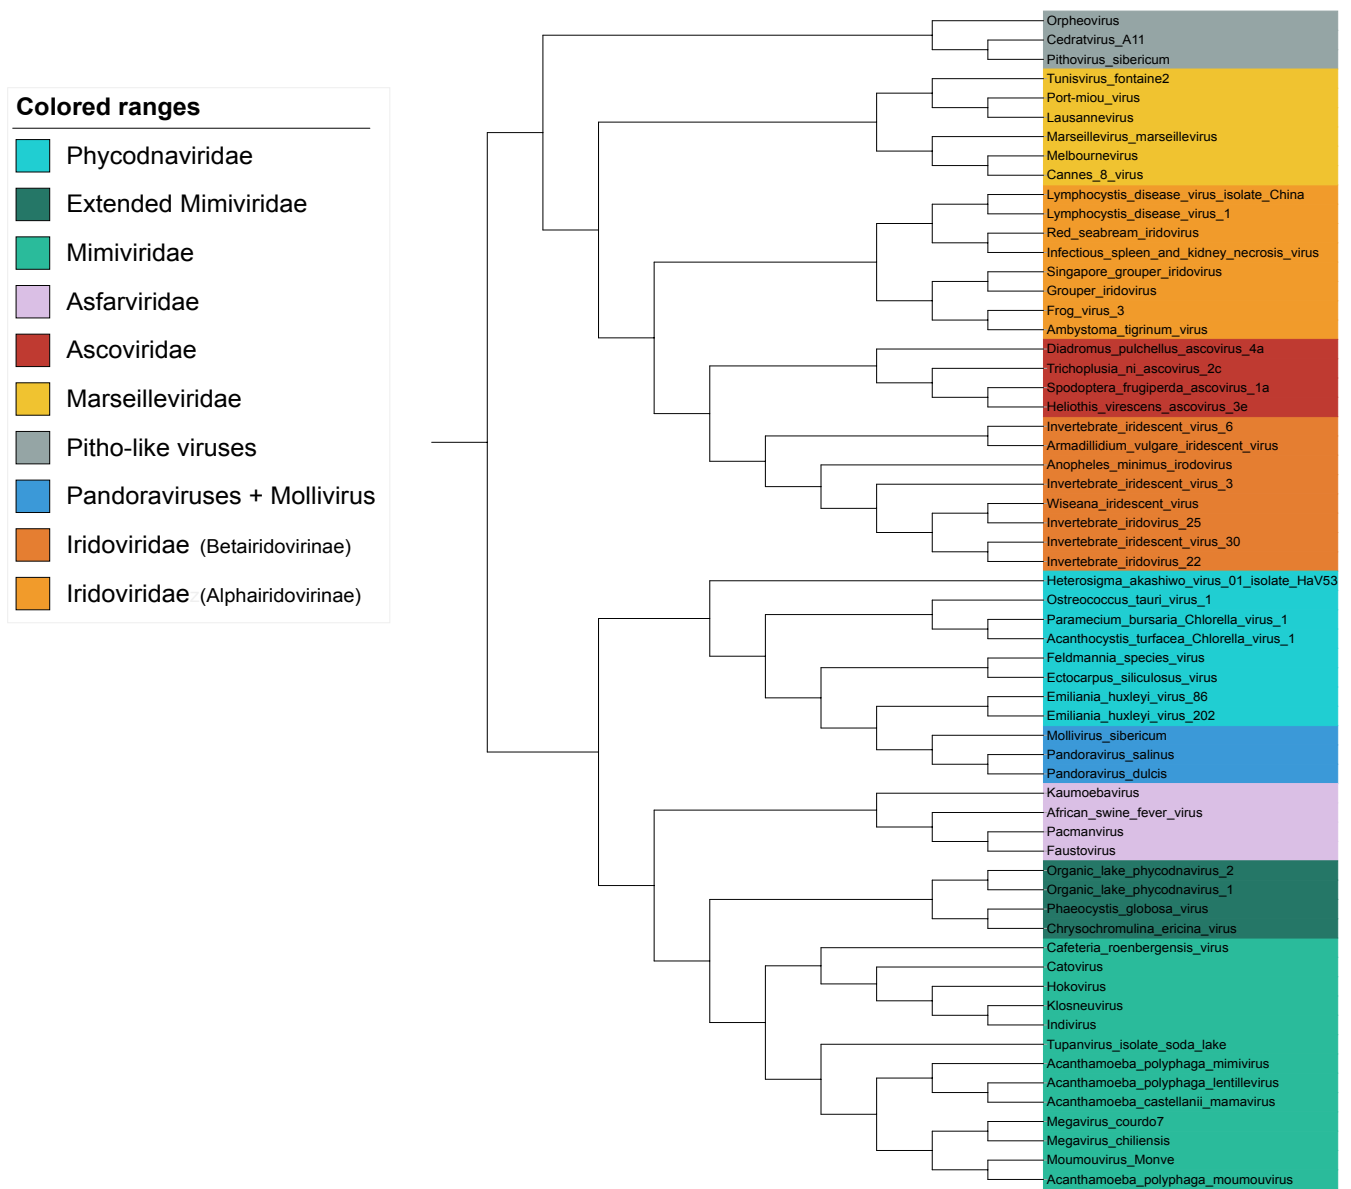

**Fig. S2. SPR Supertree of the 8 core proteins from the NCLDVs.** Supertree based on the subtree prune-and-regraft (SPR) distance from the DNA pol B, Primase, RNAP-a, RNAP-b, MCP, pATPase, TFIIS, and VLTF3-like sequences from NCLDVs after removal of *Poxviridae* and *Aureococcus anophagefferens* virus.

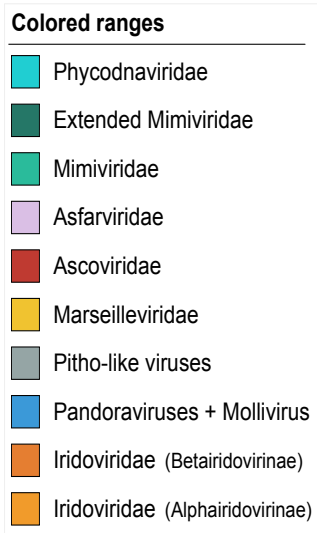

Tree scale: 0.1

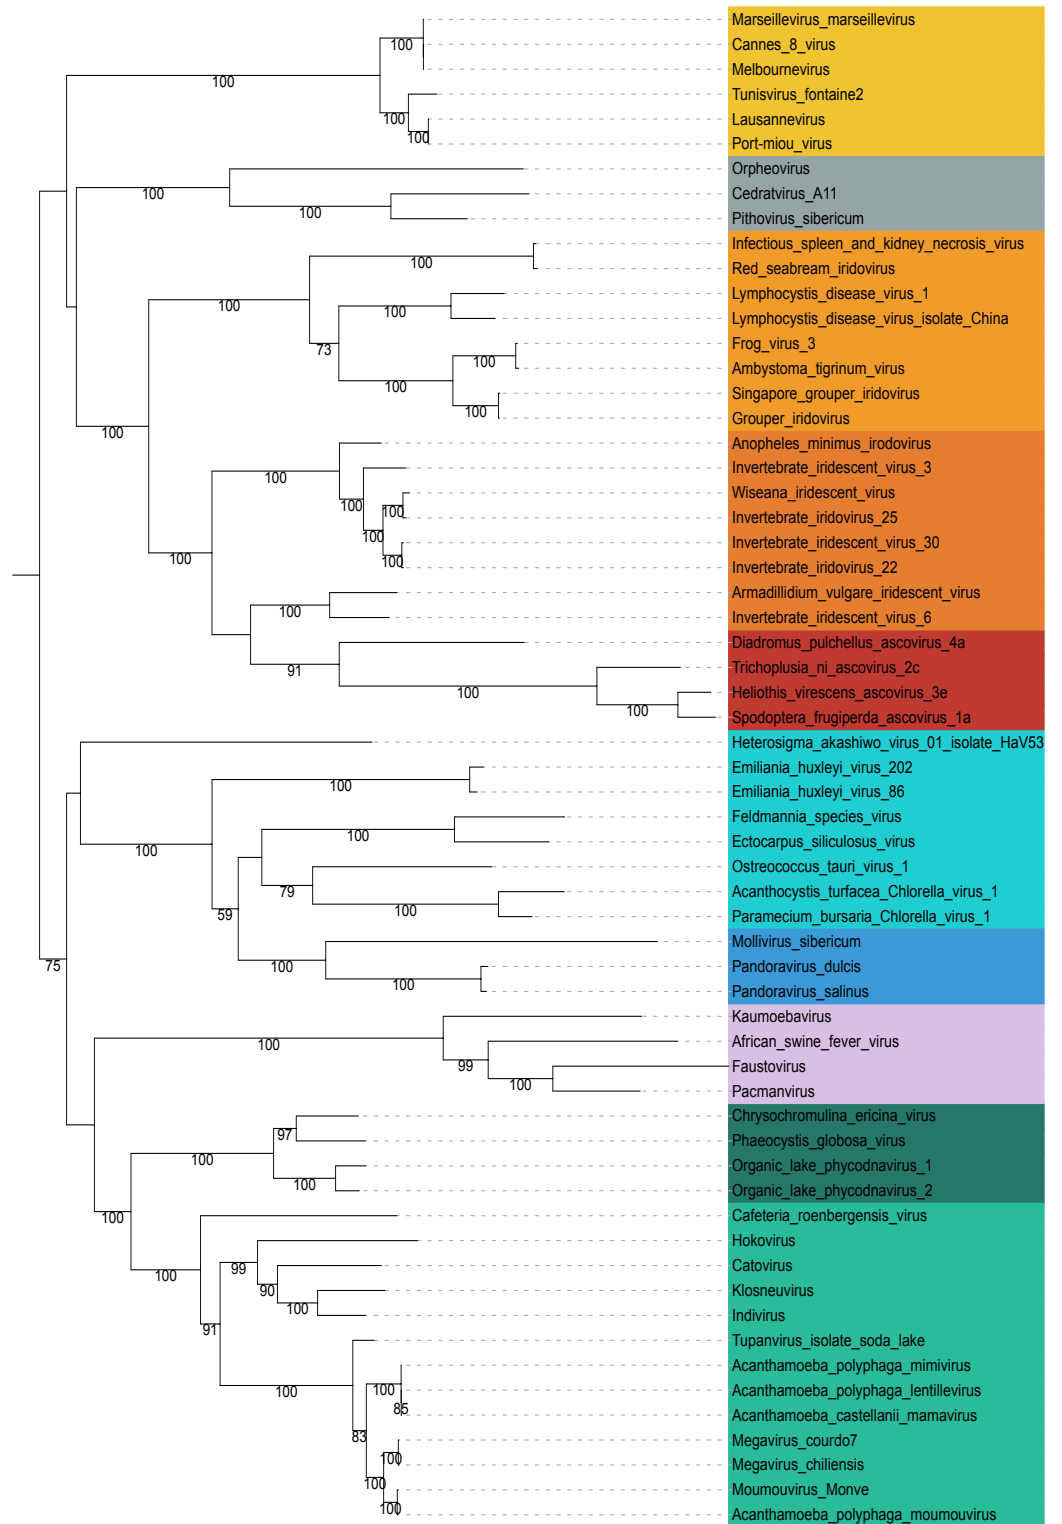

**Fig. S3. Maximum likelihood (ML) phylogenetic tree of the concatenated informational proteins from NCLDVs.** ML phylogenetic tree of the concatenation of the DNA pol B, Primase, RNAP-a, and RNAP-b sequences from NCLDVs after removal of *Poxviridae* and *Aureococcus anophagefferens* virus. The scale-bar indicates the average number of substitutions per site. Values on branches represent support calculated by nonparametric bootstrap; only supports superior to 70% are shown.

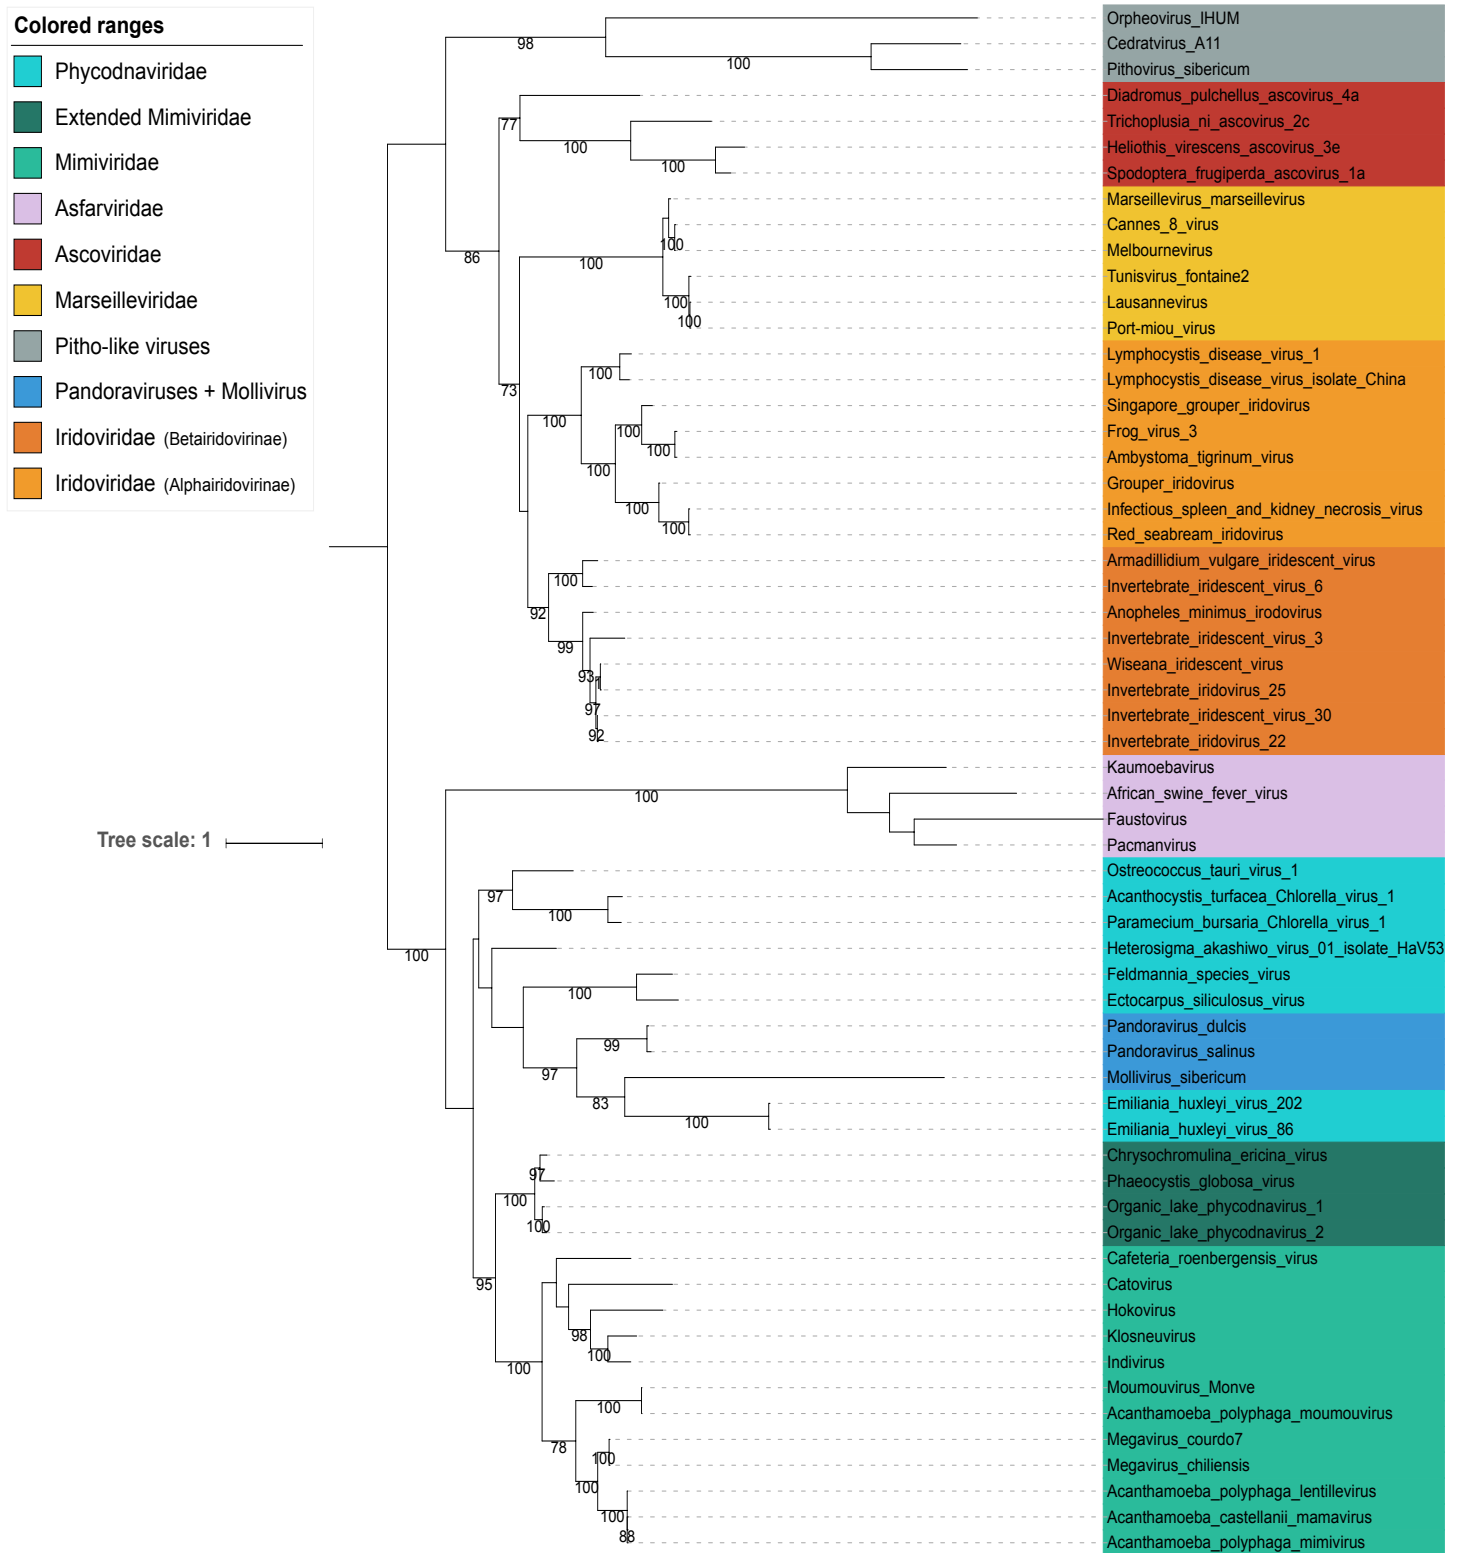

**Fig. S4. Maximum likelihood (ML) phylogenetic tree of the concatenated structural proteins from NCLDVs.** ML phylogenetic tree of the concatenation of the MCP and pATPase from NCLDVs after removal of *Poxviridae* and *Aureococcus anophagefferens* virus. The scale-bar indicates the average number of substitutions per site. Values on branches represent support calculated by nonparametric bootstrap; only supports superior to 70% are shown.



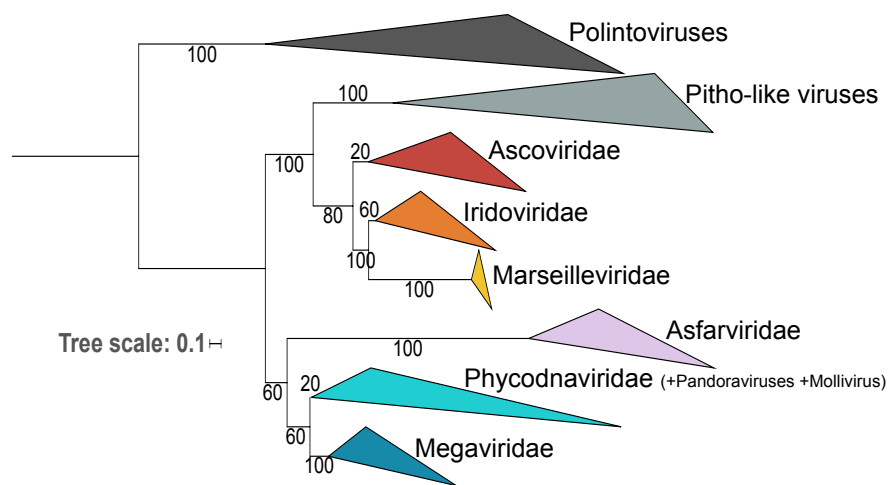

**Fig. S5. Relationships between Polintoviruses and NCLDVs.** Maximum likelihood (ML) phylogenetic tree of the concatenated structural proteins from Polintoviruses and NCLDVs after removal of *Poxviridae* and *Aureococcus anophagefferens* virus. The scale-bar indicates the average number of substitutions per site. The values at branches represent support calculated by nonparametric bootstrap.



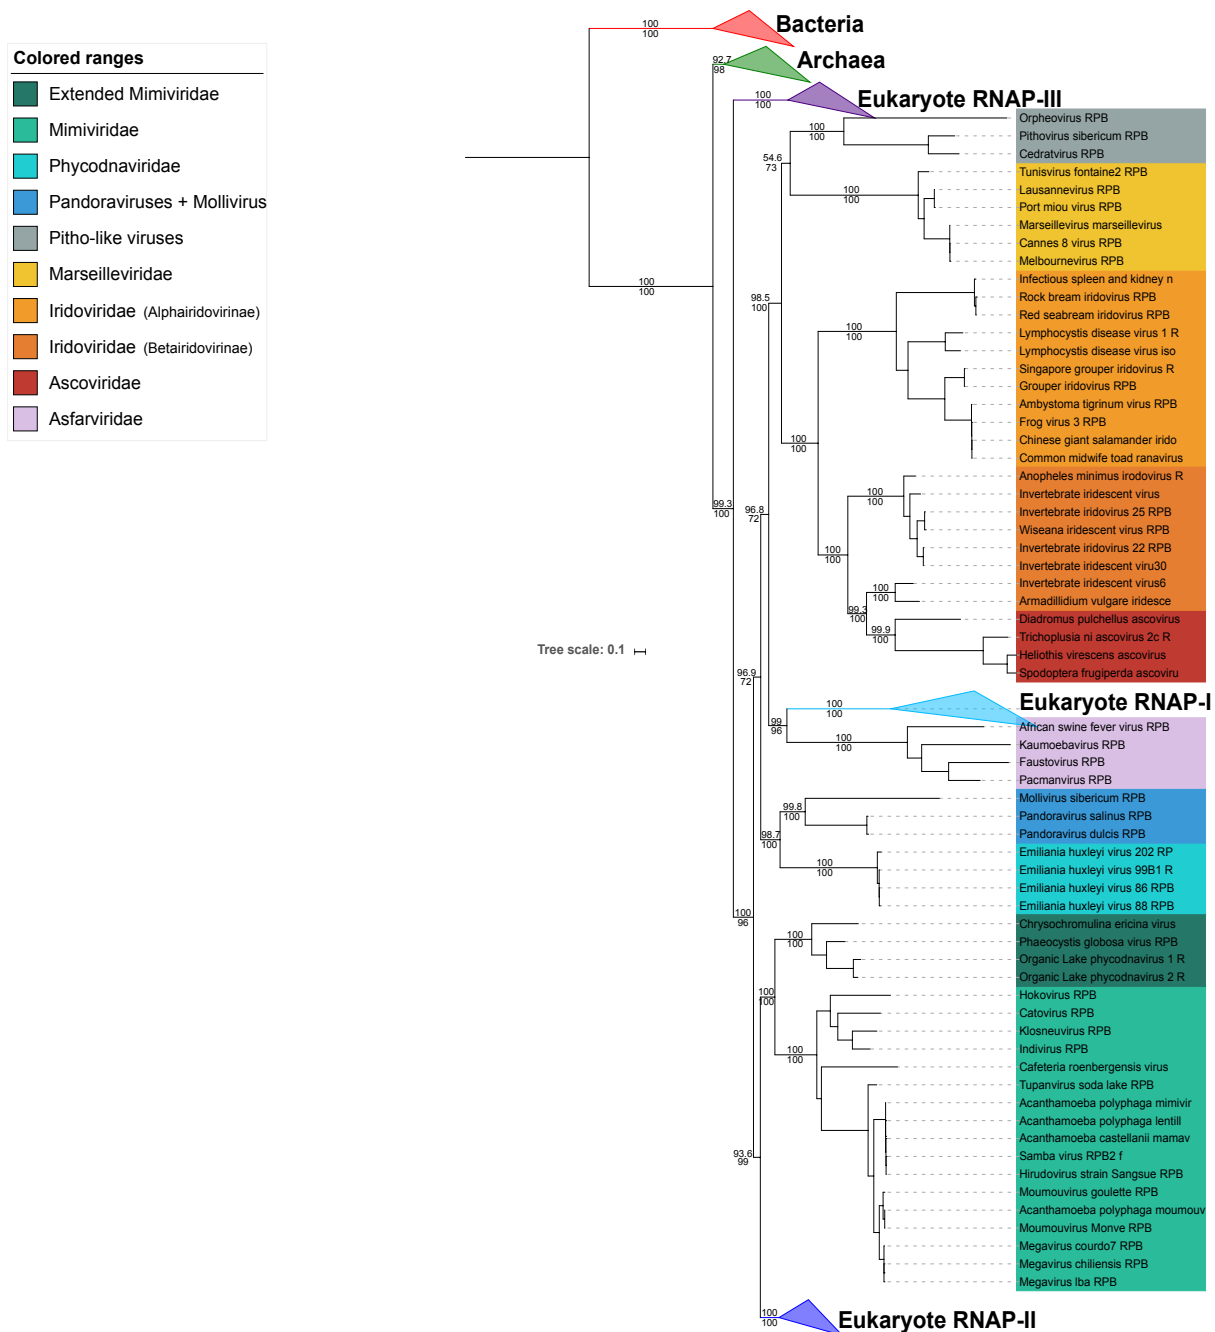

**Fig. S7. Maximum likelihood (ML) phylogenetic tree of the concatenated two largest RNA polymerase subunits from Bacteria, Archaea, Eukaryotes, and NCLDVs.** ML phylogenetic tree of the concatenation of RNAP-a and RNAP-b, with Bacteria used as the outgroup. The scale-bar indicates the average number of substitutions per site. Values on top and below branches represent supports calculated by SH-like approximate likelihood ratio test (aLRT; 1000 replicates) and ultrafast bootstrap approximation (UFBoot; 1000 replicates), respectively. Only values for major branches (main clades and their relationships) are shown.

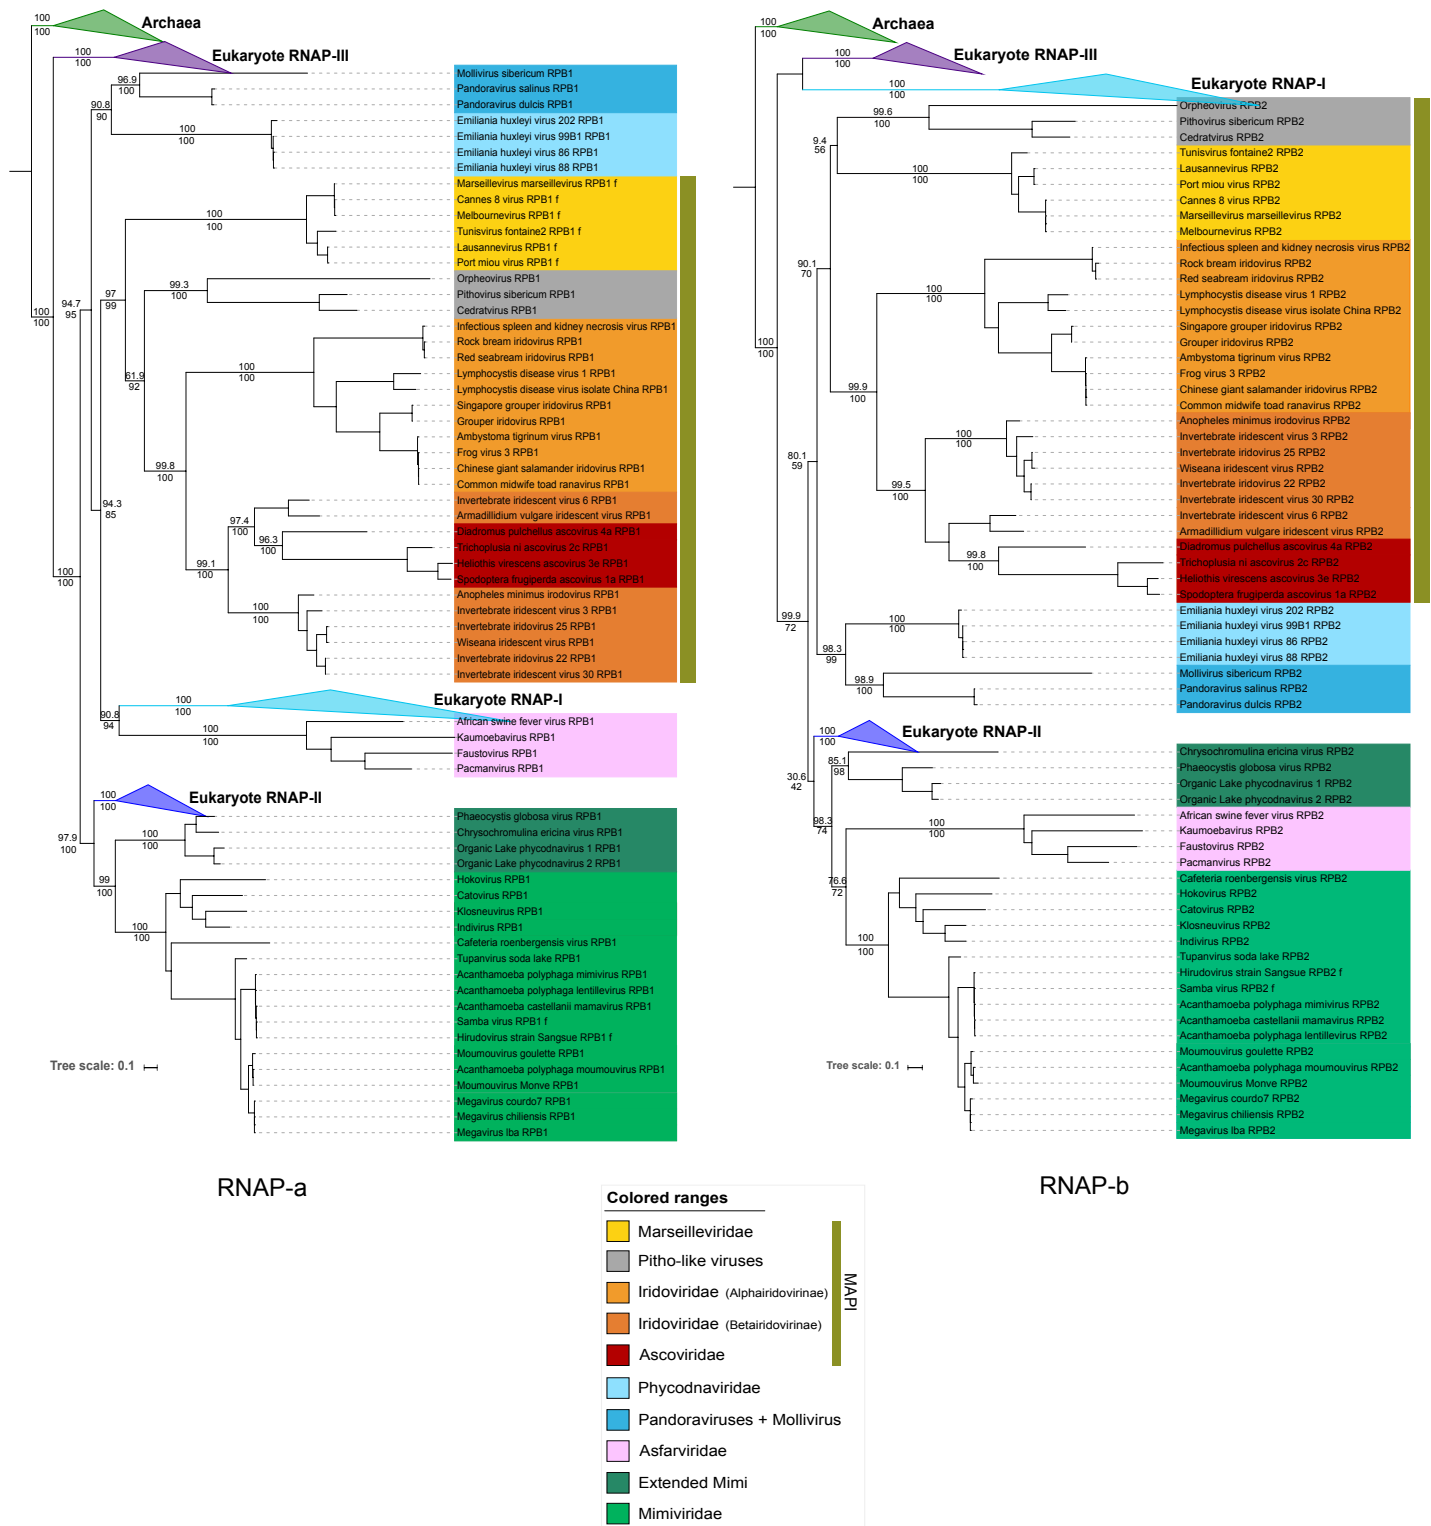

**Fig. S8. Maximum likelihood (ML) single-protein trees of the two largest RNA polymerase subunits from Archaea, Eukaryotes, and NCLDVs.** ML phylogenetic trees of the RNAP-a (left) and RNAP-b (right), with Archaea used as the outgroup. The scale-bars indicate the average number of substitutions per site. Values on top and below branches represent supports calculated by SH-like approximate likelihood ratio test (aLRT; 1000 replicates) and ultrafast bootstrap approximation (UFBoot; 1000 replicates), respectively. Only values for major branches (main clades and their relationships) are shown.

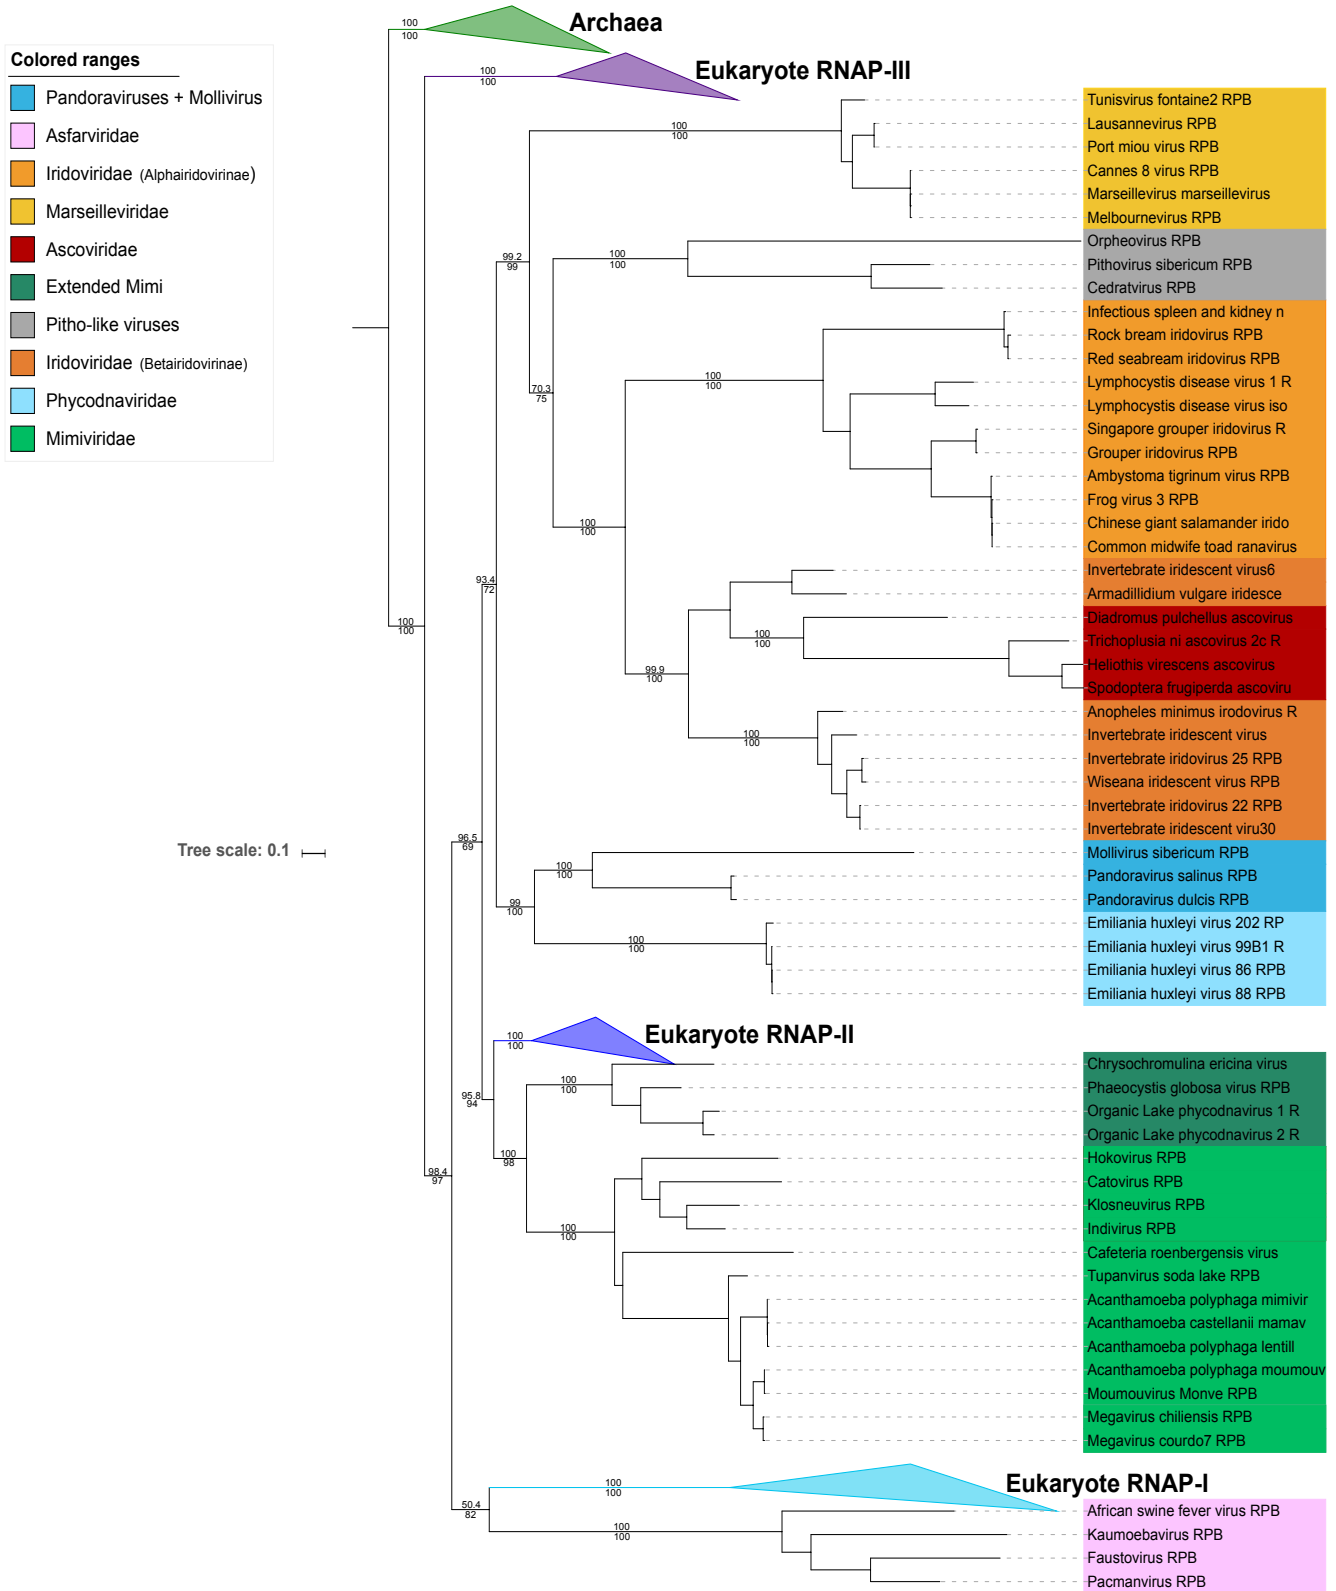

**Fig. S9. Maximum likelihood (ML) phylogenetic tree of the concatenated two largest RNA polymerase subunits from Archaea, Eukaryotes, and NCLDVs.** ML phylogenetic tree of the concatenation of RNAP-a and RNAP-b, with Archaea used as the outgroup. The scale-bar indicates the average number of substitutions per site. Values on top and below branches represent supports calculated by SH-like approximate likelihood ratio test (aLRT; 1000 replicates) and ultrafast bootstrap approximation (UFBoot; 1000 replicates), respectively. Only values for major branches (main clades and their relationships) are shown.

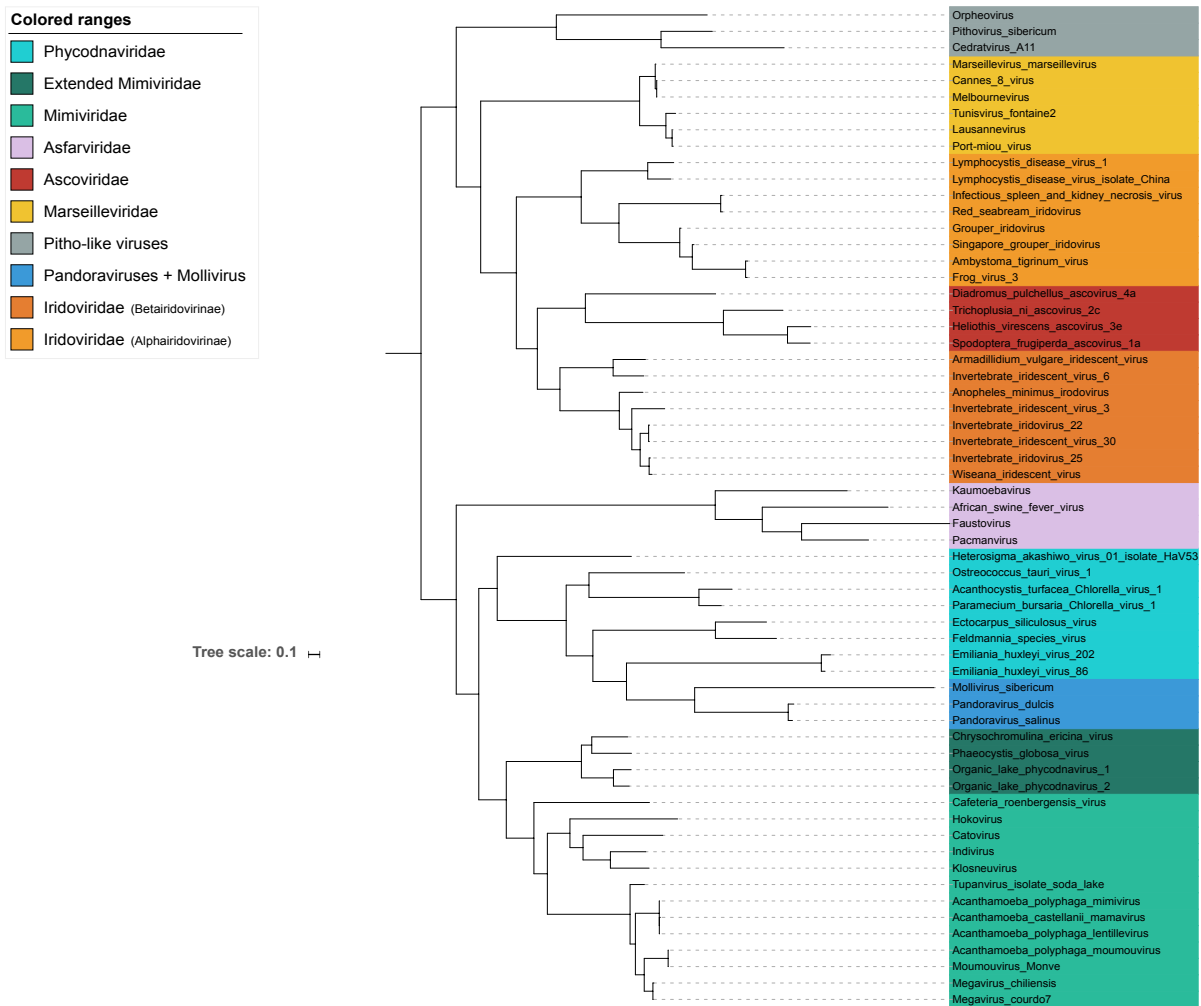

**Fig. S10. Maximum likelihood (ML) phylogenetic tree of the concatenation of all core proteins but the two RNAP subunits from NCLDVs.** ML tree of the concatenation of the DNA pol B, Primase, MCP, pATPase, TFIS, and VLTF3-like sequences from NCLDVs obtained during the comparative phylogenetics test (see Methods and Table S3). The scale-bar indicates the average number of substitutions per site.

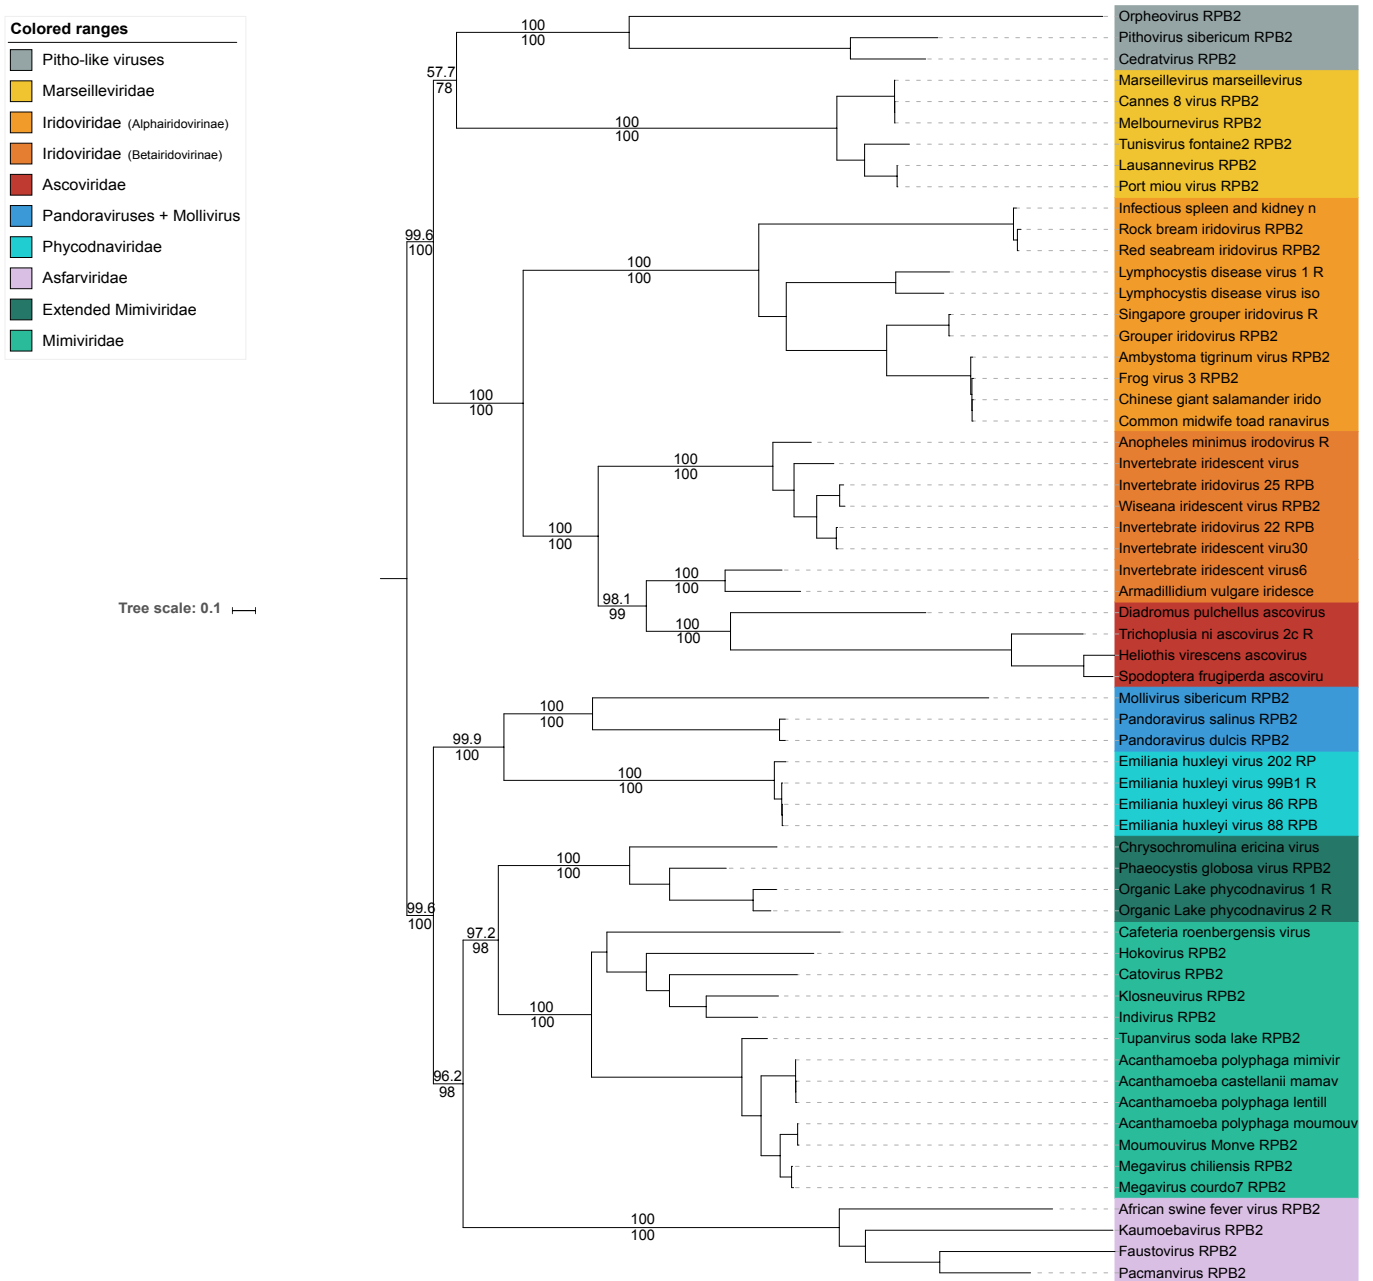

**Fig. S11. Maximum likelihood (ML) phylogenetic tree of the concatenated two largest RNA polymerase subunits from the NCLDVs.** The scale-bars indicates the average number of substitutions per site. Values on top and below branches represent supports calculated by SH-like approximate likelihood ratio test (aLRT; 1000 replicates) and ultrafast bootstrap approximation (UFBoot; 1000 replicates), respectively. Only values for major branches (main clades and their relationships) are shown.

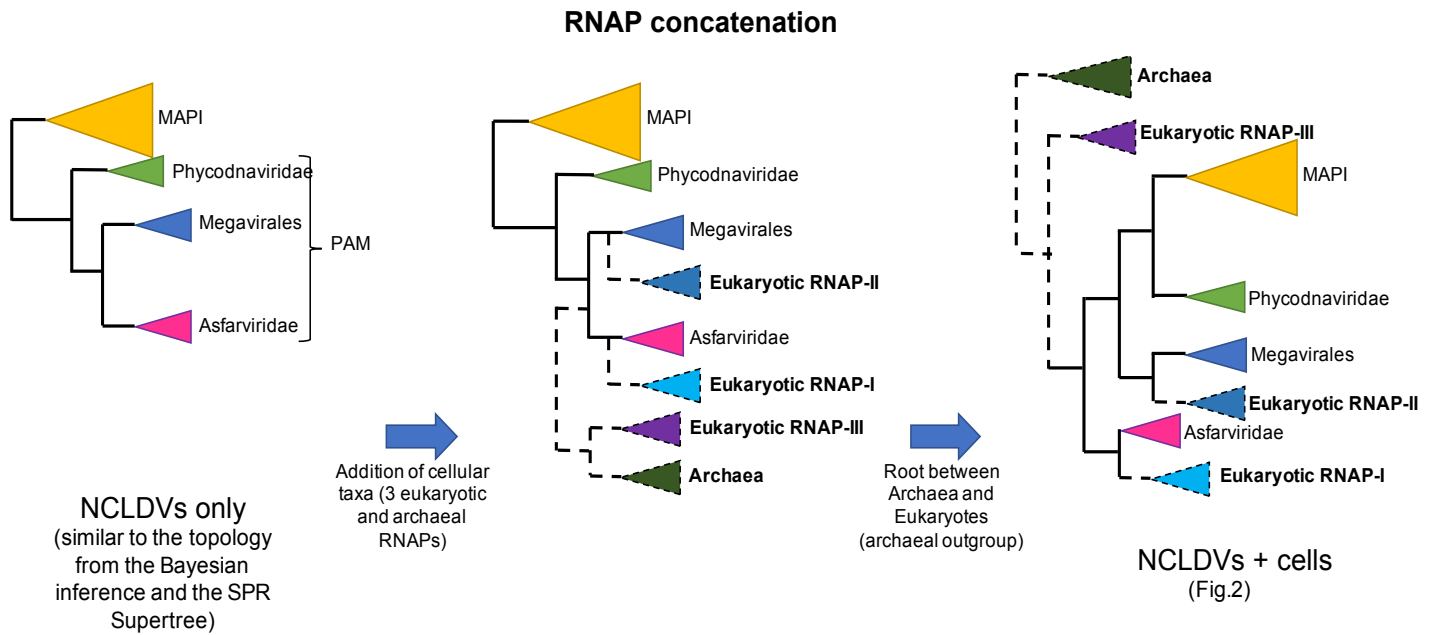

**Fig. S12. Schematic representation of the congruence in NCLDV topologies obtained before and after the inclusion of cellular sequences in the concatenated RNAP-subunits tree.** Schematic representation of the evolution of the RNAP concatenation topologies after the inclusion of sequences from eukaryotes and archaea, and then after the rooting between the Archaea and the rest of the tree.



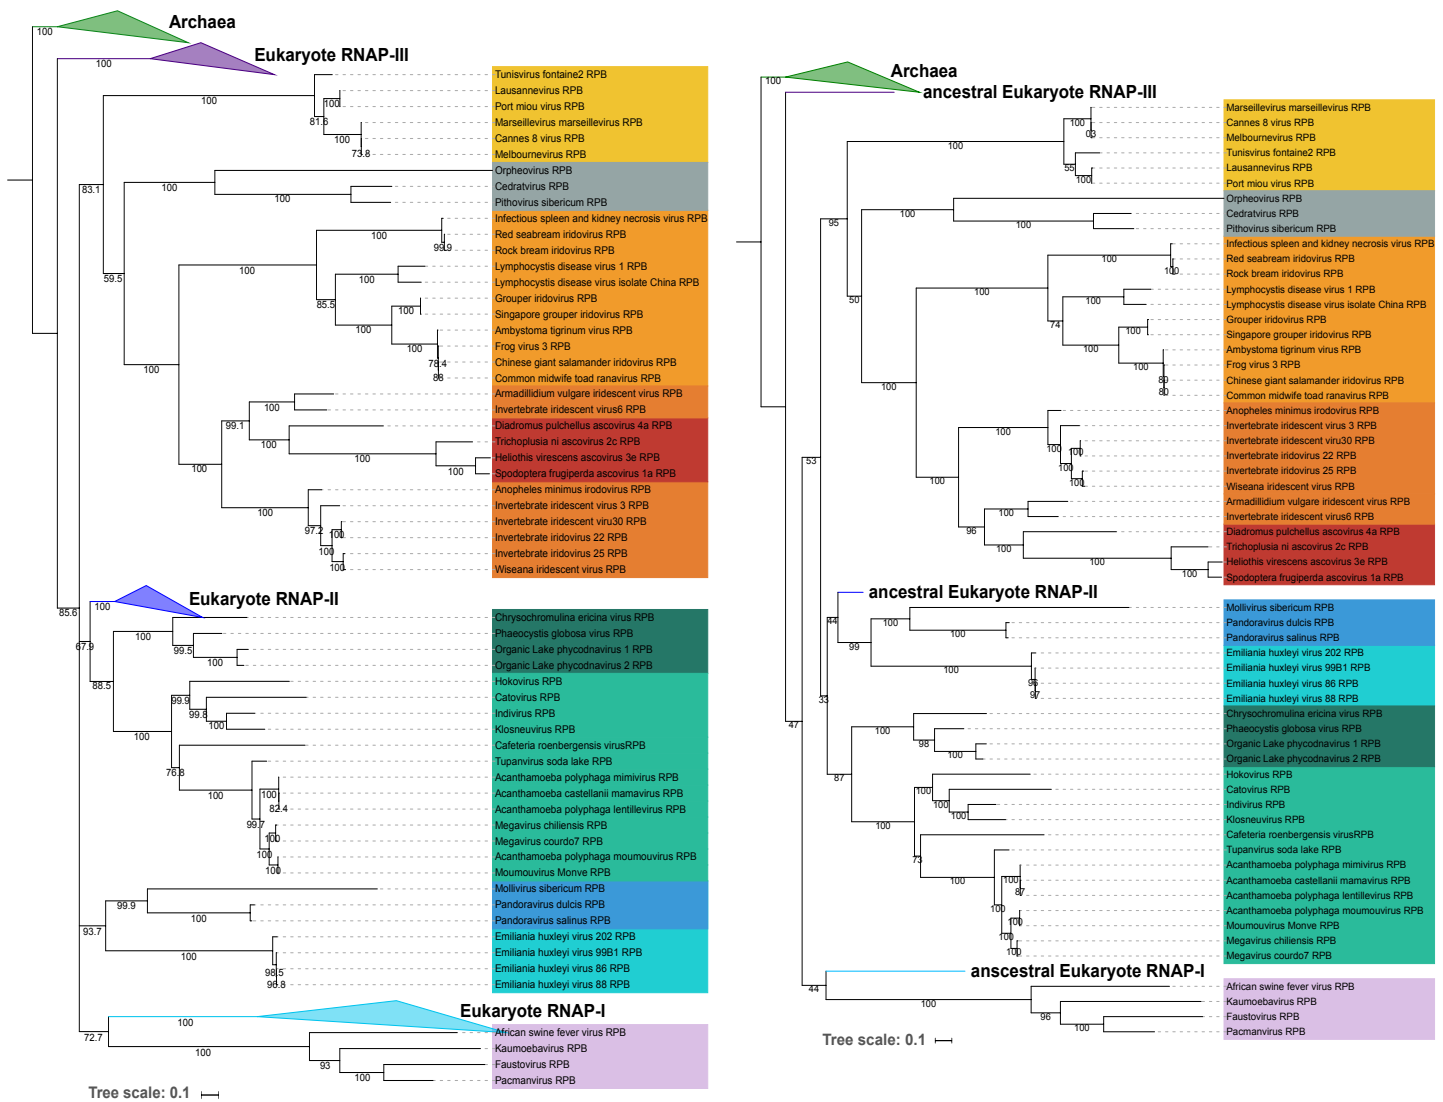

Consensus bootstrap tree

**Colored ranges**

- Asfarviridae
- Phycodnaviridae
- Pandoraviruses + Mollivirus
- Marseillevirus
- Pitho-like viruses
- Extended Mimiviridae
- Mimiviridae
- Iridoviridae (Alphairidovirinae)
- Ascoviridae
- Iridoviridae (Betairidovirinae)

Ancestral sequences

**Fig. S13. Phylogenetic trees of the concatenated two largest RNA polymerase subunits from Archaea, Eukaryotes, and NCLDVs, obtained through consensus bootstrap reconstruction (left) and maximum likelihood (ML) with ancestral sequences reconstructed (right).** Consensus bootstrap tree (left) obtained from the concatenation of RNAP-a and RNAP-b, with Archaea used as the outgroup. ML phylogenetic tree (right) of the concatenation of RNAP-a and RNAP-b, with Archaea used as the outgroup and the eukaryotic polymerases replaced by their reconstructed ancestral sequences. The scale-bars indicate the average number of substitutions per site. Supports were calculated by nonparametric bootstrap.

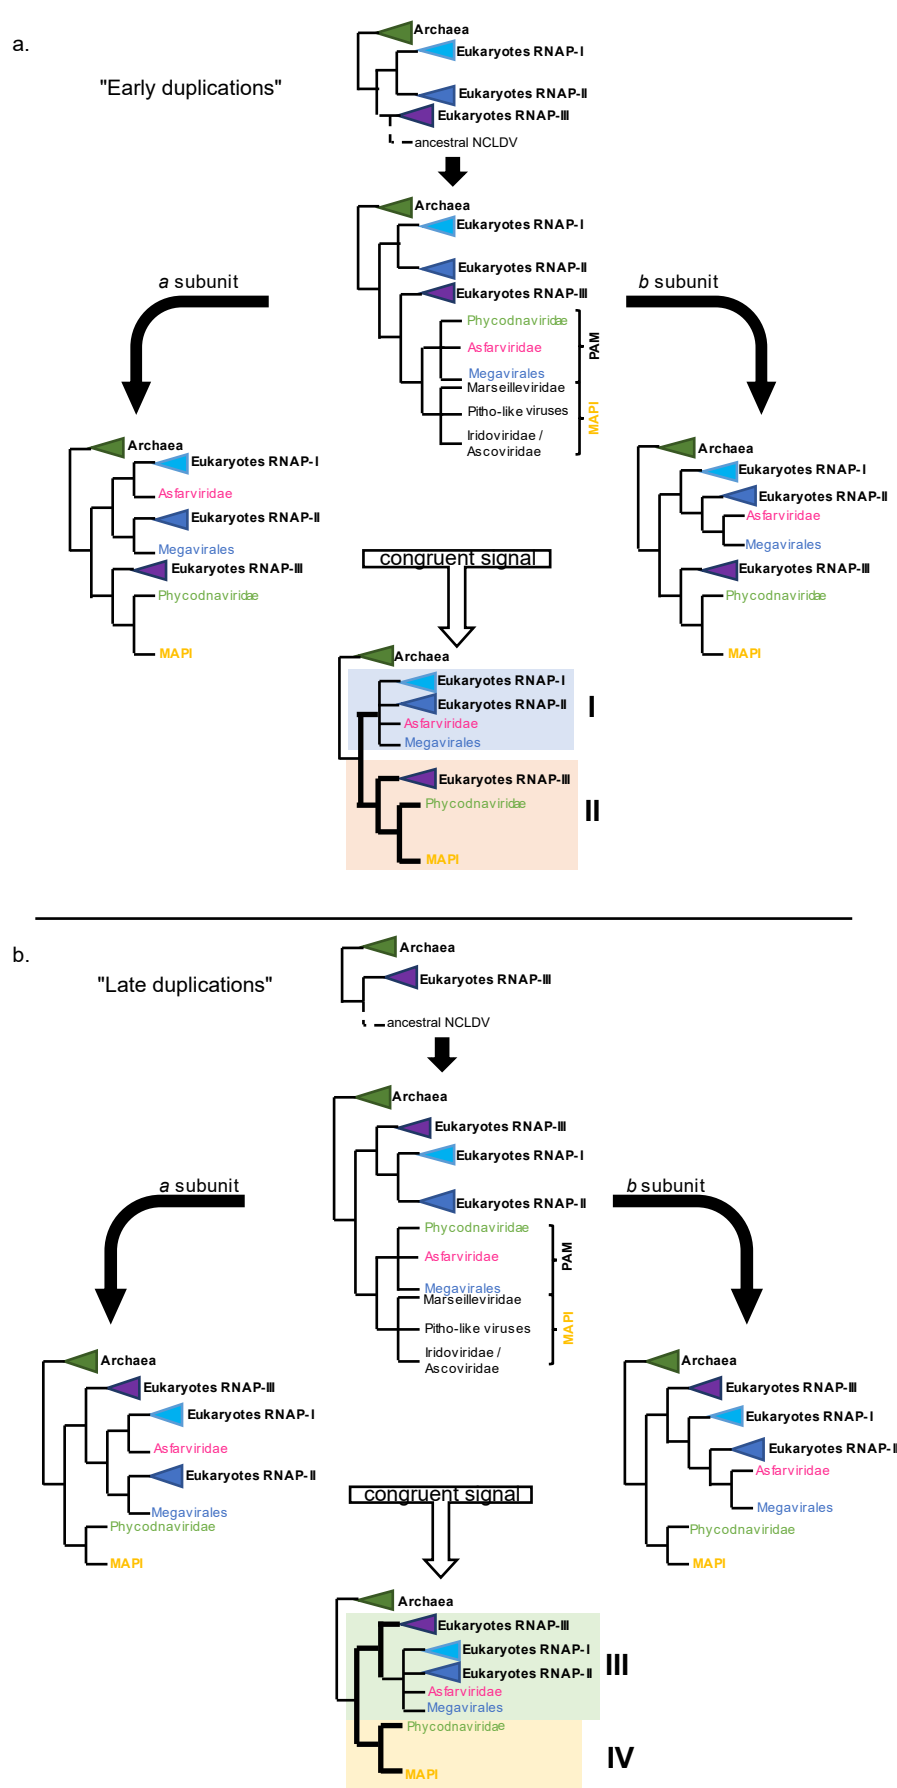

**Fig. S14. Schematic representations of two alternative scenarios for the transfers of RNAPs from cells to viruses with the congruent signals expected from the two subunits.** The eukaryotic RNAP-I and -II originated from duplication events, either before the transfer of the ancestral eukaryotic RNAP (more alike RNAP-III) to the ancestor of NCLDVs ("Early duplications"), or after the transfer ("Late duplications"). In the first scenario (**a.**), the two subunits should contain a congruent signal for a clade containing the eukaryotic RNAP-I/-II together with the "Megavirales" and the *Asfarviridae* (I), and another containing the Eukaryotic RNAP-III with the MAPI and the *Phycodnaviridae* (II). In the other scenario (**b.**), a congruent signal should be expected for a clade grouping the MAPI superclade with the *Phycodnaviridae* (IV) branching separately from a clade comprising the *Asfarviridae*, the "Megavirales", and the three eukaryotic RNAPs (III). None of these clades are observed in the phylogenetic trees.

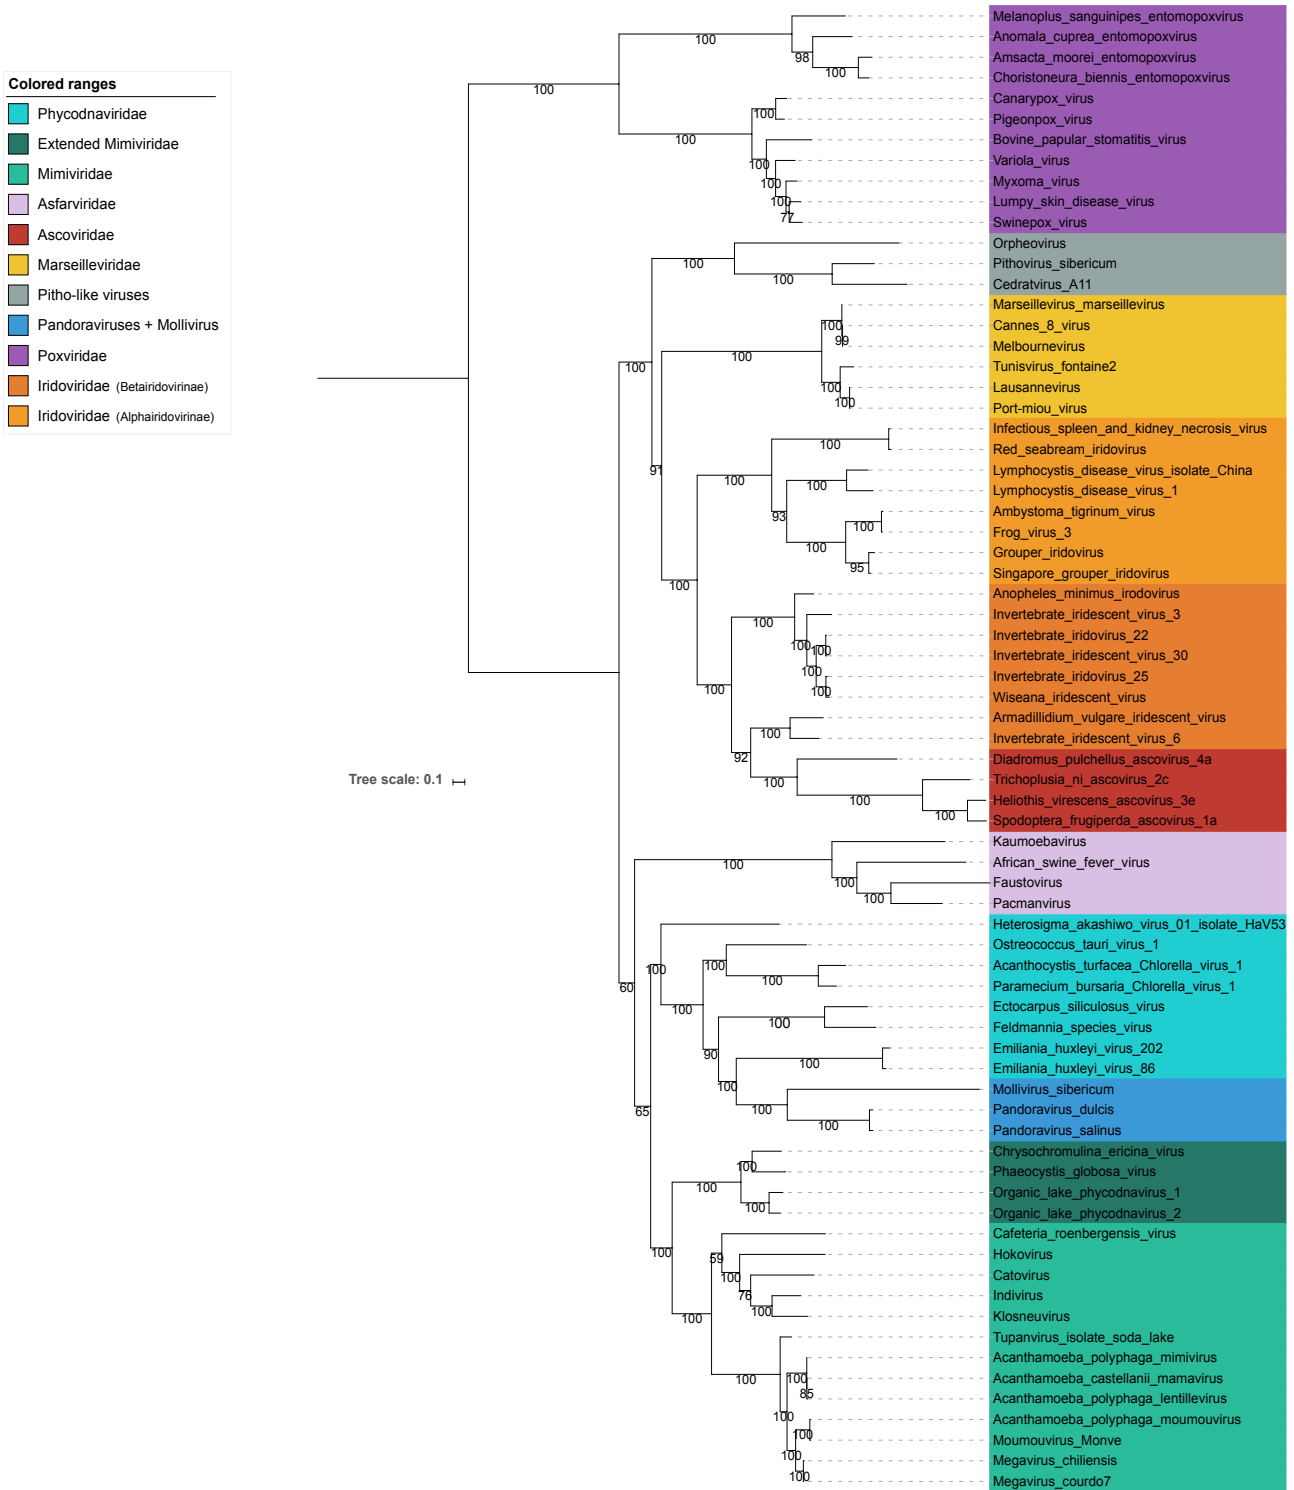

**Fig. S15. Maximum likelihood (ML) phylogenetic tree of the concatenated 8 core genes from the NCLDVs, including *Poxviridae*.** ML phylogenetic tree of the concatenation of the DNA pol B, Primase, RNAP-a, RNAP-b, MCP, pATPase, TFIIS, and VLTf3-like sequences from NCLDVs, with *Poxviridae* used as the outgroup. The scale-bar indicates the average number of substitutions per site. Values on branches represent support calculated by nonparametric bootstrap.

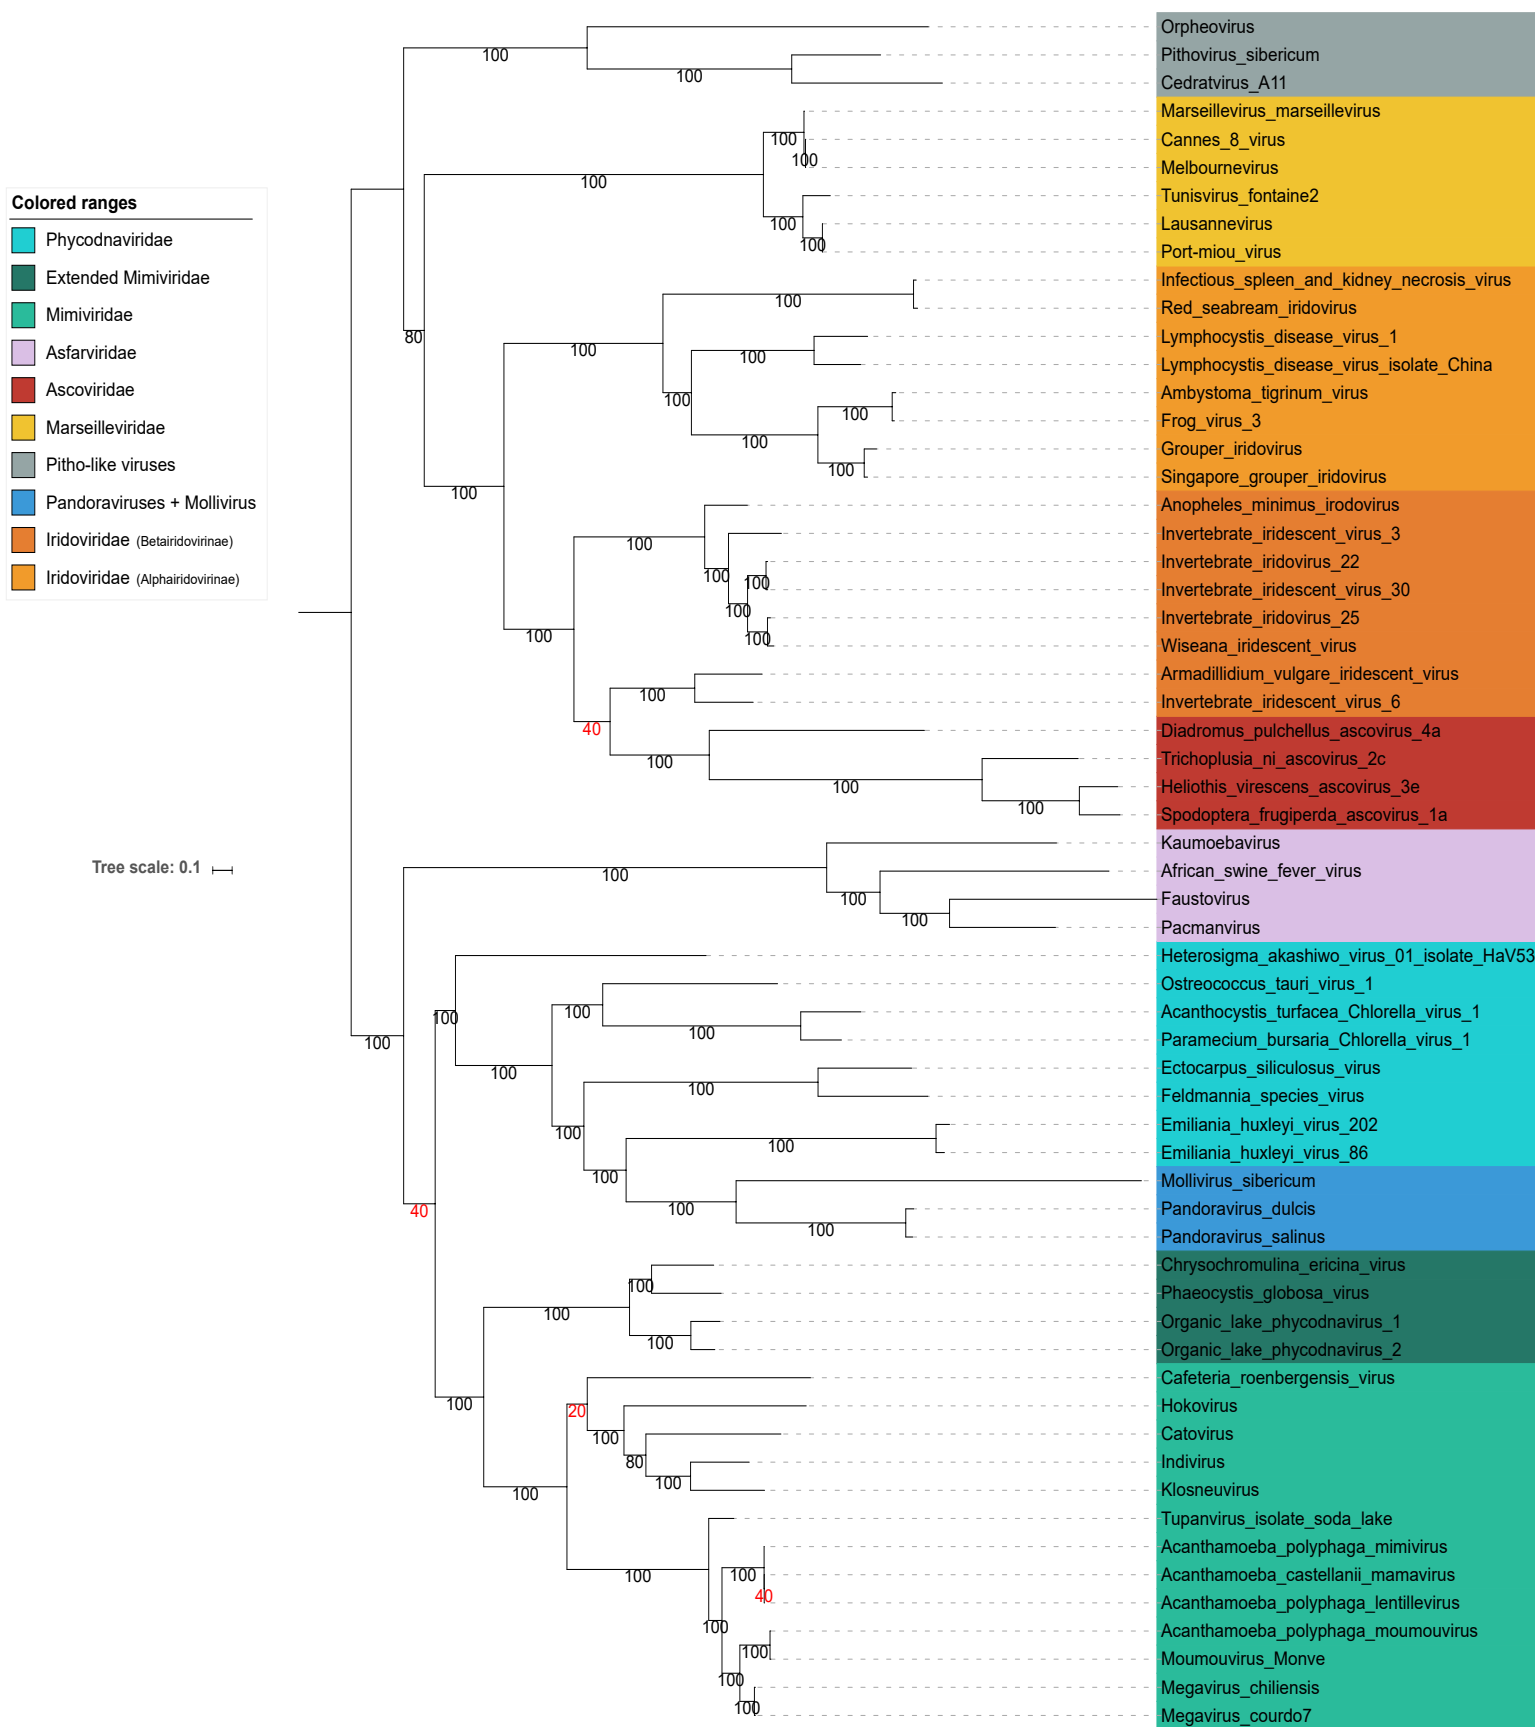

**Fig. S16. Maximum likelihood (ML) phylogenetic tree of the concatenated 8 core genes from the NCLDVs.** ML phylogenetic tree of the concatenation of the DNA pol B, Primase, RNAP-a, RNAP-b, MCP, pATPase, TFIIIS, and VLTF3-like sequences from NCLDVs after removal of *Poxviridae* and *Aureococcus anophagefferens* virus. The scale-bar indicates the average number of substitutions per site. Values on branches represent support calculated by nonparametric bootstrap; supports inferior to 70% are shown in red.

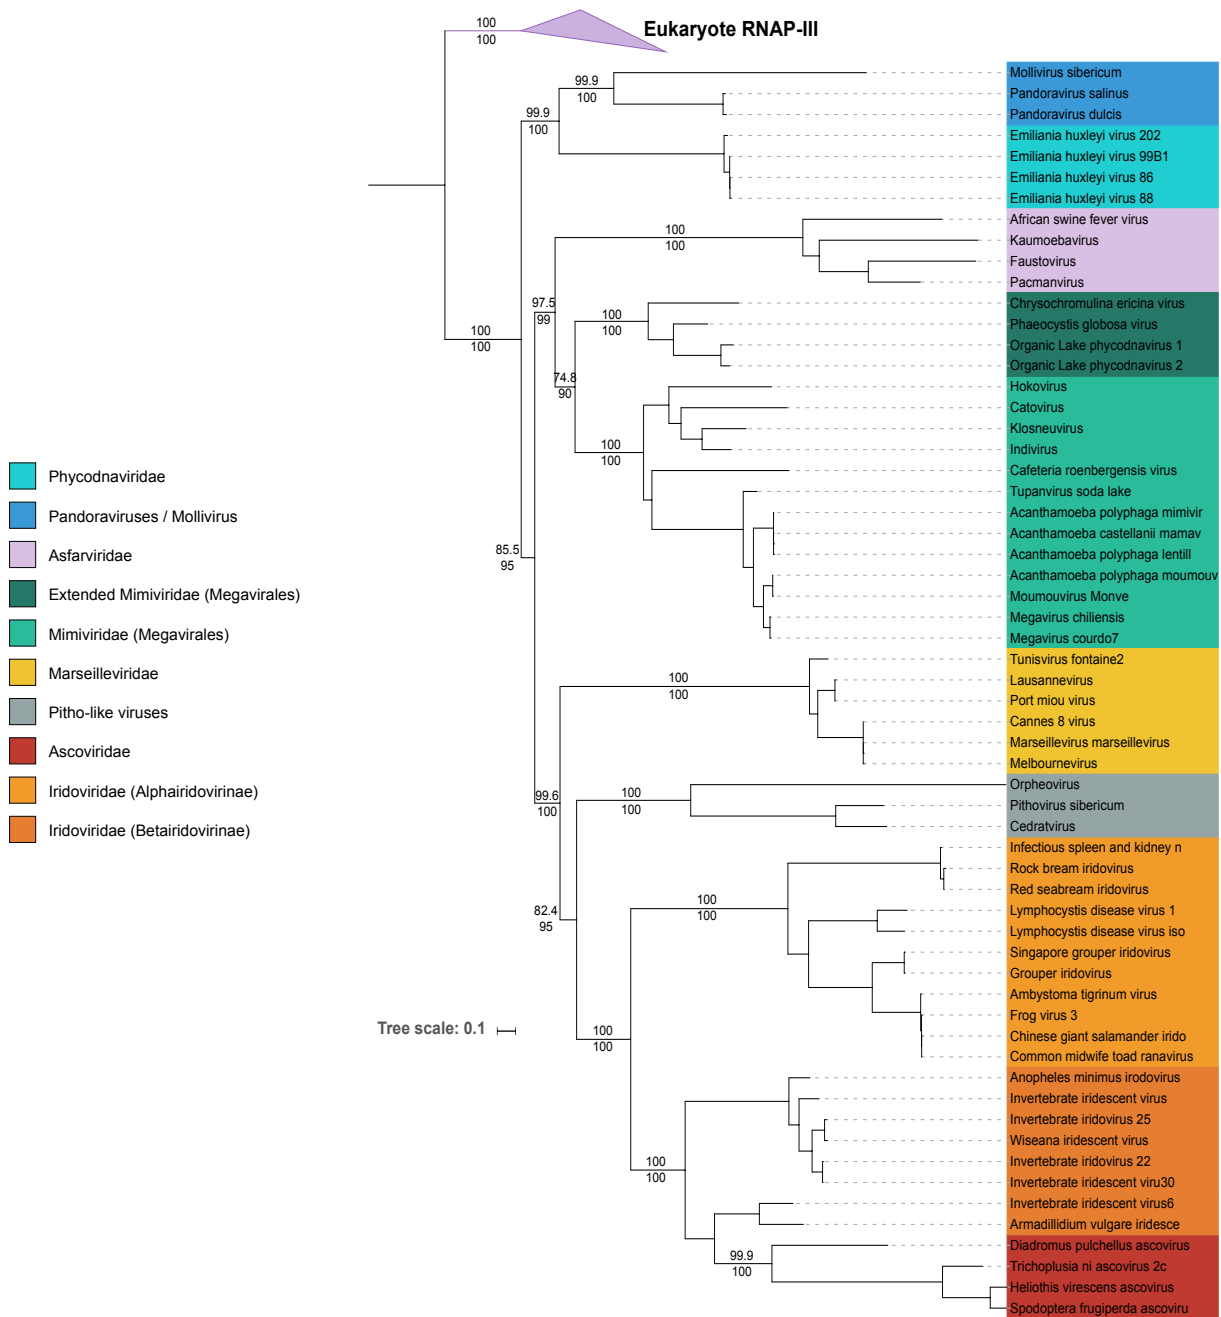

**Fig. S17. Maximum likelihood (ML) phylogenetic tree of the concatenated two largest RNA polymerase subunits from the NCLDVs and the eukaryotic RNAP-III.** The scale-bar indicates the average number of substitutions per site. Values on top and below branches represent supports calculated by SH-like approximate likelihood ratio test (aLRT; 1000 replicates) and ultrafast bootstrap approximation (UFBoot; 1000 replicates), respectively. Only values for major branches (main clades and their relationships) are shown. The eukaryotic RNAP-III sequences have been used as outgroup.

**Table S1. List and access numbers of NCLDV genomes included in this study.**

| Name                                        | Genome ID                                                                                                                                                                        | Core genome | Phylogenetic analyses |
|---------------------------------------------|----------------------------------------------------------------------------------------------------------------------------------------------------------------------------------|-------------|-----------------------|
| Aureococcus anophagefferens virus           | NC_024697.1                                                                                                                                                                      | √           | x                     |
| Diadromus pulchellus ascovirus 4a           | NC_011335.1                                                                                                                                                                      | √           | √                     |
| Heliolithis virescens ascovirus 3e          | NC_009233.1                                                                                                                                                                      | √           | √                     |
| Spodoptera frugiperda ascovirus 1a          | NC_008361.1                                                                                                                                                                      | √           | √                     |
| Trichoplusia ni ascovirus 2c                | NC_008518.1                                                                                                                                                                      | √           | √                     |
| African swine fever virus                   | NC_001659.2                                                                                                                                                                      | √           | √                     |
| Faustovirus                                 | KJ614390.1                                                                                                                                                                       | √           | √                     |
| Ambystoma tigrinum virus                    | NC_005832.1                                                                                                                                                                      | √           | √                     |
| Andrias davidianus ranavirus                | KC865735.1                                                                                                                                                                       | √           | x                     |
| Anopheles minimus iridovirus                | NC_023848.1                                                                                                                                                                      | √           | √                     |
| Armadillidium vulgare iridescent virus      | NC_024451.1                                                                                                                                                                      | √           | √                     |
| Chinese giant salamander iridovirus         | KF512820.1                                                                                                                                                                       | √           | x                     |
| Common midwife toad ranavirus               | KP056312.1                                                                                                                                                                       | √           | x                     |
| Epizootic haematopoietic necrosis virus     | NC_028461.1                                                                                                                                                                      | √           | x                     |
| European catfish virus                      | NC_017940.1                                                                                                                                                                      | √           | x                     |
| Frog virus 3                                | NC_005946.1                                                                                                                                                                      | √           | √                     |
| German gecko ranavirus                      | KP266742.1                                                                                                                                                                       | √           | x                     |
| Grouper iridovirus                          | AY666015.1                                                                                                                                                                       | √           | √                     |
| Invertebrate iridovirus 22                  | NC_021901.1                                                                                                                                                                      | √           | √                     |
| Invertebrate iridovirus 25                  | NC_023613.1                                                                                                                                                                      | √           | √                     |
| Infectious spleen and kidney necrosis virus | NC_003494.1                                                                                                                                                                      | √           | √                     |
| Invertebrate iridescent virus 3             | NC_008187.1                                                                                                                                                                      | √           | √                     |
| Invertebrate iridescent virus 6             | NC_003038.1                                                                                                                                                                      | √           | √                     |
| Invertebrate iridescent virus 30            | NC_023611.1                                                                                                                                                                      | √           | √                     |
| Lymphocystis disease virus 1                | NC_001824.1                                                                                                                                                                      | √           | √                     |
| Orange-spotted grouper iridovirus           | AY894343.1                                                                                                                                                                       | √           | x                     |
| Rana grylio iridovirus                      | JQ654586.1                                                                                                                                                                       | √           | x                     |
| Red seabream iridovirus                     | AB104413.1                                                                                                                                                                       | √           | √                     |
| Rock bream iridovirus                       | KC244182.1                                                                                                                                                                       | √           | x                     |
| Singapore grouper iridovirus                | NC_006549.1                                                                                                                                                                      | √           | √                     |
| Soft-shelled turtle iridovirus              | EU627010.1                                                                                                                                                                       | √           | x                     |
| Testudo hermanni ranavirus                  | KP266741.1                                                                                                                                                                       | √           | x                     |
| Tiger frog virus                            | AF389451.1                                                                                                                                                                       | √           | x                     |
| Tortoise ranavirus                          | KP266743.1                                                                                                                                                                       | √           | x                     |
| Turbot reddish body iridovirus              | GQ273492.1                                                                                                                                                                       | √           | x                     |
| Wiseana iridescent virus                    | NC_015780.1                                                                                                                                                                      | √           | √                     |
| Cannes 8 virus                              | KF261120.1                                                                                                                                                                       | √           | √                     |
| Lausannevirus                               | NC_015326.1                                                                                                                                                                      | √           | √                     |
| Marseillevirus marseillevirus               | NC_013756.1                                                                                                                                                                      | √           | √                     |
| Melbournevirus                              | NC_025412.1                                                                                                                                                                      | √           | √                     |
| Port-miou virus                             | NC_028047.1                                                                                                                                                                      | √           | √                     |
| Tunisvirus fontaine2                        | KF483846.1                                                                                                                                                                       | √           | √                     |
| Acanthamoeba castellanii mamavirus          | JF801956.1                                                                                                                                                                       | √           | √                     |
| Acanthamoeba polyphaga lentillevirus        | AFYC01000001.1<br>AFYC01000002.1<br>AFYC01000003.1<br>AFYC01000004.1<br>AFYC01000005.1<br>AFYC01000006.1<br>AFYC01000007.1<br>AFYC01000008.1<br>AFYC01000009.1<br>AFYC01000010.1 | √           | √                     |
| Acanthamoeba polyphaga mimivirus            | NC_014649.1                                                                                                                                                                      | √           | √                     |
| Acanthamoeba polyphaga moumouvirus          | NC_020104.1                                                                                                                                                                      | √           | √                     |
| Cafeteria roenbergensis virus               | NC_014637.1                                                                                                                                                                      | √           | √                     |
| Hirudovirus strain Sangsue                  | KF493731.1                                                                                                                                                                       | √           | x                     |
| Megavirus chiliensis                        | NC_016072.1                                                                                                                                                                      | √           | √                     |
| Megavirus courdo7                           | JN885990.1                                                                                                                                                                       | √           | √                     |
| Megavirus courdo7                           | JN885991.1<br>JN885991.1<br>JN885992.1<br>JN885993.1                                                                                                                             | √           | √                     |
| Megavirus lba                               | NC_020232.1                                                                                                                                                                      | √           | x                     |
| Moumouvirus goulette                        | KC008572.1                                                                                                                                                                       | √           | x                     |
| Moumouvirus Monve                           | JN885994.1<br>JN885995.1<br>JN885996.1<br>JN885997.1<br>JN885998.1<br>JN885999.1<br>JN886000.1<br>JN886001.1                                                                     | √           | √                     |

| Name                                        | Genome ID                                                                                                                                                                                                                                                | Core genome | Phylogenetic analyses |
|---------------------------------------------|----------------------------------------------------------------------------------------------------------------------------------------------------------------------------------------------------------------------------------------------------------|-------------|-----------------------|
| Samba virus                                 | KF959826.2                                                                                                                                                                                                                                               | √           | x                     |
| Pandoravirus dulcis                         | NC_021858.1                                                                                                                                                                                                                                              | √           | √                     |
| Pandoravirus salinus                        | NC_022098.1                                                                                                                                                                                                                                              | √           | √                     |
| Acanthocystis turfacea Chlorella virus 1    | NC_008724.1                                                                                                                                                                                                                                              | √           | √                     |
| Chrysochromulina ericina virus              | NC_028094.1                                                                                                                                                                                                                                              | √           | √                     |
| Ectocarpus siliculosus virus                | NC_002687.1                                                                                                                                                                                                                                              | √           | √                     |
| Emiliania huxleyi virus 86                  | NC_007346.1                                                                                                                                                                                                                                              | √           | √                     |
| Feldmannia species virus                    | NC_011183.1                                                                                                                                                                                                                                              | √           | √                     |
| Organic lake phycodnavirus 1                | HQ704802.1                                                                                                                                                                                                                                               | √           | √                     |
| Organic lake phycodnavirus 2                | HQ704803.1                                                                                                                                                                                                                                               | √           | √                     |
| Ostreococcus tauri virus 1                  | NC_013288.1                                                                                                                                                                                                                                              | √           | √                     |
| Paramecium bursaria Chlorella virus 1       | NC_000852.5                                                                                                                                                                                                                                              | √           | √                     |
| Phaeocystis globosa virus                   | NC_021312.1                                                                                                                                                                                                                                              | √           | √                     |
| Amsacta moorei entomopoxvirus               | AF250284.1                                                                                                                                                                                                                                               | √           | x                     |
| Anomala cuprea entomopoxvirus               | NC_023426.1                                                                                                                                                                                                                                              | √           | x                     |
| Bovine papular stomatitis virus             | NC_005337.1                                                                                                                                                                                                                                              | √           | x                     |
| Canarypox virus                             | NC_005309.1                                                                                                                                                                                                                                              | √           | x                     |
| Choristoneura biennis entomopoxvirus        | NC_021248.1                                                                                                                                                                                                                                              | √           | x                     |
| Cowpox virus                                | NC_003663.2                                                                                                                                                                                                                                              | √           | x                     |
| Lumpy skin disease virus                    | NC_003027.1                                                                                                                                                                                                                                              | √           | x                     |
| Melanoplus sanguinipes entomopoxvirus       | NC_001993.1                                                                                                                                                                                                                                              | √           | x                     |
| Myxoma virus                                | NC_001132.2                                                                                                                                                                                                                                              | √           | x                     |
| Penguinpox virus                            | NC_024446.1                                                                                                                                                                                                                                              | √           | x                     |
| Pigeonpox virus                             | NC_024447.1                                                                                                                                                                                                                                              | √           | x                     |
| Swinepox virus                              | NC_003389.1                                                                                                                                                                                                                                              | √           | x                     |
| Vaccinia virus                              | NC_006998.1                                                                                                                                                                                                                                              | √           | x                     |
| Variola virus                               | NC_001611.1                                                                                                                                                                                                                                              | √           | x                     |
| Cedratvirus A11                             | NC_032108.1                                                                                                                                                                                                                                              | x           | √                     |
| Mollivirus sibericum                        | NC_027867.1                                                                                                                                                                                                                                              | √           | √                     |
| Pithovirus sibericum                        | NC_023423.1                                                                                                                                                                                                                                              | √           | √                     |
| Heterosigma akashiwo virus 01 isolate HaV53 | KX008963.1                                                                                                                                                                                                                                               | x           | √                     |
| Kaumoebavirus                               | NC_034249.1                                                                                                                                                                                                                                              | x           | √                     |
| Pacmanvirus                                 | NC_034383.1                                                                                                                                                                                                                                              | x           | √                     |
| Klosneuvirus                                | KY684123.1<br>KY684122.1<br>KY684121.1<br>KY684120.1<br>KY684119.1<br>KY684118.1<br>KY684117.1<br>KY684116.1<br>KY684115.1<br>KY684114.1<br>KY684113.1<br>KY684112.1<br>KY684111.1<br>KY684110.1<br>KY684109.1<br>KY684108.1                             | x           | √                     |
| Indivirus                                   | KY684102.1<br>KY684101.1<br>KY684100.1<br>KY684099.1<br>KY684098.1<br>KY684097.1<br>KY684096.1<br>KY684095.1<br>KY684094.1<br>KY684093.1<br>KY684092.1<br>KY684091.1<br>KY684090.1<br>KY684089.1<br>KY684088.1<br>KY684087.1<br>KY684086.1<br>KY684085.1 | x           | √                     |
| Catovirus                                   | KY684083.1<br>KY684084.1                                                                                                                                                                                                                                 | x           | √                     |
| Hokovirus                                   | KY684103.1<br>KY684104.1<br>KY684105.1<br>KY684106.1<br>KY684107.1                                                                                                                                                                                       | x           | √                     |
| Tupanvirus isolate soda lake                | KY523104.1                                                                                                                                                                                                                                               | x           | √                     |
| Orpheovirus                                 | LT906555.1                                                                                                                                                                                                                                               | x           | √                     |



**Table S3. List and taxon IDs of the cellular taxa used in this study.**

|                                  | Phylum                            | Species                                                                                                                                                          | Taxon ID                                       |
|----------------------------------|-----------------------------------|------------------------------------------------------------------------------------------------------------------------------------------------------------------|------------------------------------------------|
| <b>Bacteria</b>                  |                                   |                                                                                                                                                                  |                                                |
| PVC Planctomycetes               |                                   | Gemmata obscuriglobus UQM 2246<br>Rhodopirellula baltica strain SH 1                                                                                             | 214688<br>243090                               |
| Bacterioidetes                   |                                   | Rhodothermus marinus DSM 4252<br>Bacteriodes fragilis<br>Chlorobaculum parvum NCIB 8327                                                                          | 518766<br>862962<br>517417                     |
| Gammaproteobacteria              |                                   | Escherichia coli str. K-12 substr. MG1655 (W3110)<br>Legionella longbeachae NSW150<br>Acinetobacter baumannii 1656-2                                             | 511145<br>661367<br>696749                     |
| Firmicutes                       |                                   | Bacillus subtilis subsp. Subtilis str. 168<br>Natranaerobius thermophilus JW/NM-WN-LF<br>Listeria innocua Clip11262                                              | 224308<br>457570<br>272626                     |
| Cyanobacteria                    |                                   | Synechocystis sp. PCC 6714<br>Prochloron didemni<br>Cyanothece sp. PCC 7424                                                                                      | 1147<br>1216<br>65393                          |
| Deinococcus-thermus              |                                   | Deinococcus radiodurans R1<br>Truepera radiovictrix DSM 17093<br>Marinithermus hydrothermalis DSM 14884                                                          | 243230<br>649638<br>869210                     |
| Thermotogae                      |                                   | Kosmotoga olearia TBF 19.5.1<br>Fervidobacterium nodosum Rt17-B1<br>Thermotoga maritima MSB8                                                                     | 521045<br>381764<br>243274                     |
| Chloroflexi                      |                                   | Anaerolinea thermophila UNI-1<br>Thermomicrobium roseum DSM 5159                                                                                                 | 926569<br>309801                               |
| Actinobacteria                   |                                   | Catenulispora acidiphila DSM 44928<br>Streptosporangium roseum DSM 43021<br>Kineococcus radiotolerans SRS30216                                                   | 479433<br>479432<br>266940                     |
| Spirochaetes                     |                                   | Brachyspira hyodysenteriae WA1<br>Treponema azotonutricium ZAS-9<br>Borrelia afzelii Pko                                                                         | 565034<br>545695<br>390236                     |
| PVC Verrucomicrobia              |                                   | Coralimargarita akajimensis DSM 45221<br>Opitutus terrae PB90-1                                                                                                  | 583355<br>452637                               |
| PVC Chlamydiae                   |                                   | Simkania negevensis Z<br>Chlamydia muridarum Nigg                                                                                                                | 331113<br>1434773                              |
| Deltaproteobacteria              |                                   | Pelobacter carbinolicus DSM 2380<br>Desulfobulbus propionicus DSM 2032                                                                                           | 338963<br>577650                               |
| Alphaproteobacteria              |                                   | Acetobacter pasteurianus IFO 3283-01-42C<br>Dinoroseobacter shibae DFL 12<br>Bartonella bacilliformis KC583                                                      | 634458<br>398580<br>360095                     |
| Betaproteobacteria               |                                   | Thiobacillus denitrificans ATCC 25259<br>Burkholderia ambifaria AMMD                                                                                             | 292415<br>339670                               |
| <b>Archaea</b>                   |                                   |                                                                                                                                                                  |                                                |
| Crenarchaeota                    | Desulfurococcales                 | Pyrolobus fumarii 1A<br>Aeropyrum pernix K1<br>Desulfurococcus kamchatkensis 1221n<br>Ignicoccus hospitalis KIN4 I                                               | 694429<br>272557<br>490899<br>453591           |
|                                  | Sulfolobales                      | Metallosphaera sedula DSM 5348<br>Sulfolobus tokodaii str.7                                                                                                      | 399549<br>273063                               |
|                                  | Thermoproteales                   | Thermoproteus tenax Kra 1<br>Thermofilum pendens Hrk 5<br>Vulcanisaeta moutnovskia 768-28<br>Caldivirga maquilingensis IC-167<br>Pyrobaculum aerophilum str. IM2 | 768679<br>368408<br>985053<br>397948<br>178306 |
| Thaumarchaeota                   |                                   | Nitrosopumilus maritimus SCM1<br>Cenarchaeum symbiosum A<br>Candidatus Nitrosoarchaeum limnia SFB1<br>Candidatus Nitrosoarchaeum gargensis Ga.9.2                | 436308<br>414004<br>886738<br>1237085          |
|                                  | Aigarchaeota                      | Candidatus Caldiarchaeum subterraneum ASM27032                                                                                                                   | 311458                                         |
| Asgard                           |                                   | Lokiarchaeum sp. GC14 75                                                                                                                                         | 1538547                                        |
| Euryarchaeota Cluster I          | Thermococcales                    | Thermococcus nautilli 30-1<br>Thermococcus barophilus MP<br>Pyrococcus abyssi GE5                                                                                | 195522<br>391623<br>272844                     |
|                                  | Methanococcales                   | Methanoterris igneus Kol 5<br>Methanococcus vannielii SB<br>Methanocaldococcus infernus ME                                                                       | 880724<br>406327<br>573063                     |
|                                  | Methanobacteriales                | Methanothermobacter formosus DSM 2088<br>Methanobrevibacter smithii ATCC 35061<br>Methanothermobacter thermautotrophicus str. Delta H                            | 523846<br>420247<br>187420                     |
| Euryarchaeota Cluster II         | Archaeoglobales                   | Ferroglobus placidus DSM 10642<br>Archaeoglobus veneficus                                                                                                        | 589924<br>693661                               |
|                                  | Thermoplasmatales                 | Ferroplasma acidarmanus fer1                                                                                                                                     | 333146                                         |
|                                  | Methanomassiliicoccales           | Candidatus Methanomethylophilus alvus Mx1201                                                                                                                     | 1236689                                        |
|                                  | DHEV2                             | Aciduliprofundum boonei T469                                                                                                                                     | 439481                                         |
|                                  | Methanosarcinales                 | Methanosarcina mazei Go1                                                                                                                                         | 192952                                         |
|                                  |                                   | Methanococcoides burtonii DSM 6242                                                                                                                               | 259564                                         |
|                                  |                                   | Methanosaeta harundinacea 6Ac                                                                                                                                    | 1110509                                        |
|                                  | Methanomicrobiales                | Methanocorpusculum labreanum Z                                                                                                                                   | 410358                                         |
|                                  |                                   | Methanoregula boonei 6A8                                                                                                                                         | 456442                                         |
| Halobacteriales                  | Natrialba magadii ATCC 43099      | 547559                                                                                                                                                           |                                                |
|                                  | Haloarcula marismortui ATCC 43049 | 272569                                                                                                                                                           |                                                |
| Methanocellales                  | Methanocella paludicola SANAE     | 304371                                                                                                                                                           |                                                |
| <b>Eukaryotes</b>                |                                   |                                                                                                                                                                  |                                                |
| Opisthokonta                     | insertae sedis                    | Capsaspora owczarzaki                                                                                                                                            | 595528                                         |
|                                  | Metazoa                           | Homo sapiens                                                                                                                                                     | 9606                                           |
|                                  |                                   | Drosophila melanogaster                                                                                                                                          | 7227                                           |
| Xenopus (Silurana) tropicalis    |                                   | 8364                                                                                                                                                             |                                                |
| Amphimedon queenslandica         |                                   | 400682                                                                                                                                                           |                                                |
| mus musculus domesticus C57BL/6J |                                   | 10092                                                                                                                                                            |                                                |
| Choanoflagellida                 | Salpingoeca rosetta               | 946362                                                                                                                                                           |                                                |



|               |                 |                                |         |
|---------------|-----------------|--------------------------------|---------|
|               |                 | Monosiga brevicollis           | 431895  |
|               | Fungi           | Aspergillus fumigatus Af293    | 330879  |
|               |                 | Schizosaccharomyces pombe 972h | 284812  |
|               |                 | Saccharomyces cerevisiae       | 765312  |
|               |                 | Batrachochytrium dendrobatidis | 684364  |
|               |                 | Yarrowia lipolytica            | 284591  |
|               |                 | Ustilago maydis                | 237631  |
|               |                 | Mortierella verticillata       | 1069443 |
| Amoebozoa     | Mycetozoa       | Dictyostelium discoideum       | 352472  |
|               |                 | Polysphondylum pallidum        | 670386  |
|               |                 | Acytostelium subglobosum       | 1410327 |
|               | Discosea        | Acanthamoeba castellanii       | 1257118 |
| Discoba       | Heterolobosea   | Naegleria gruberi              | 744533  |
| Viridiplantae | Sreptophyta     | Physcomitrella patens ‡        | 3218    |
|               |                 | Oryza sativa                   | 39946   |
|               |                 | Arabidopsis thaliana           | 3702    |
|               |                 | Selaginella moellendorffii     | 88036   |
|               | Chlorophyta     | Ostreococcus lucimarinus       | 436017  |
|               |                 | Micromonas sp.                 | 296587  |
|               | Rhodophyta      | Galdieria sulphuraria          | 130081  |
|               |                 | Chondrus crispus               | 2769    |
|               | Pyrenomonadales | Guillardia theta               | 905079  |
| SAR           | Stramenopiles   | Phytophthora infestans         | 403677  |
|               |                 | Thalassiosira pseudonana       | 296543  |
|               |                 | Phaeodactylum tricornutum      | 556484  |
|               |                 | Aureococcus anophagefferens    | 44056   |
|               | Alveolata       | Oxytricha trifallax            | 1172189 |
|               |                 | Toxoplasma gondii              | 508771  |
|               |                 | Plasmodium falciparum          | 36329   |
|               |                 | Plasmodium vivax               | 126793  |
|               |                 | Babesia bigemina               | 5866    |
|               |                 | Hammondia hammondi             | 99158   |

‡ only the RNAP-II sequence of *Physcomitrella patens* is included in our analyses, as the RNAP-I and -III sequences resulted in extremely long branches in preliminary phylogenetic analyses.

## References

1. Yutin N, Koonin EV (2012) Hidden evolutionary complexity of Nucleo-Cytoplasmic Large DNA viruses of eukaryotes. *Virology* 9(1):161.
2. Legendre M, et al. (2014) Thirty-thousand-year-old distant relative of giant icosahedral DNA viruses with a pandoravirus morphology. *Proc Natl Acad Sci* 111(11):4274–4279.
3. Philippe N, et al. (2013) Pandoraviruses: amoeba viruses with genomes up to 2.5 Mb reaching that of parasitic eukaryotes. *Science* 341(6143):281–286.
4. Andreani J, et al. (2016) Cedratvirus, a double-cork structured giant virus, is a distant relative of Pithoviruses. *Viruses* 8(11):300.
5. Andreani J, et al. (2018) Orpheovirus IHUMI-LCC2: a new virus among the giant viruses. *Front Microbiol* 8. doi:10.3389/fmicb.2017.02643.
6. Hughes AL, Friedman R (2005) Poxvirus genome evolution by gene gain and loss. *Mol Phylogenet Evol* 35(1):186–195.
7. Bratke KA, McLysaght A (2008) Identification of multiple independent horizontal gene transfers into poxviruses using a comparative genomics approach. *BMC Evol Biol* 8(1):67.
8. Hughes AL, Irausquin S, Friedman R (2010) The evolutionary biology of poxviruses. *Infect Genet Evol* 10(1):50–59.
9. Moniruzzaman M, et al. (2014) Genome of brown tide virus (AaV), the little giant of the Megaviridae, elucidates NCLDV genome expansion and host–virus coevolution. *Virology* 466–467:60–70.
10. Yutin N, Colson P, Raoult D, Koonin EV (2013) Mimiviridae: clusters of orthologous genes, reconstruction of gene repertoire evolution and proposed expansion of the giant virus family. *Virology* 10(1):106.
11. Gallot-Lavallée L, Blanc G, Claverie J-M (2017) Comparative genomics of Chrysochromulina Ericina virus and other microalga-infecting large DNA viruses highlights their intricate evolutionary relationship with the established Mimiviridae family. *J Virol* 91(14). doi:10.1128/JVI.00230-17.
12. Arslan D, Legendre M, Seltzer V, Abergel C, Claverie J-M (2011) Distant Mimivirus relative with a larger genome highlights the fundamental features of Megaviridae. *Proc Natl Acad Sci* 108(42):17486–17491.
13. Colson P, de Lamballerie X, Fournous G, Raoult D (2012) Reclassification of giant viruses composing a fourth domain of Life in the new order Megavirales. *Intervirology* 55(5):321–332.

14. Santini S, et al. (2013) Genome of Phaeocystis globosa virus PgV-16T highlights the common ancestry of the largest known DNA viruses infecting eukaryotes. *Proc Natl Acad Sci* 110(26):10800–10805.
15. Boyer M, Madoui M-A, Gimenez G, La Scola B, Raoult D (2010) Phylogenetic and phyletic studies of informational genes in genomes highlight existence of a 4 domain of life including giant viruses. *PloS One* 5(12):e15530.
16. Williams TA, Embley TM, Heinz E (2011) Informational gene phylogenies do not support a fourth domain of Life for nucleocytoplasmic large DNA viruses. *PLoS ONE* 6(6):e21080.
17. Moreira D, López-García P (2015) Evolution of viruses and cells: do we need a fourth domain of life to explain the origin of eukaryotes? *Philos Trans R Soc B Biol Sci* 370(1678):20140327.
18. Sharma V, Colson P, Giorgi R, Pontarotti P, Raoult D (2014) DNA-Dependent RNA polymerase detects hidden giant viruses in published databanks. *Genome Biol Evol* 6(7):1603–1610.
19. Sharma V, et al. (2015) Welcome to pandoraviruses at the "Fourth TRUC" club. *Front Microbiol* 6. doi:10.3389/fmicb.2015.00423.
20. Sharma V, Colson P, Chabrol O, Pontarotti P, Raoult D (2015) Pithovirus sibericum, a new bona fide member of the "Fourth TRUC" club. *Front Microbiol* 6. doi:10.3389/fmicb.2015.00722.
21. Moreira D, López-García P (2009) Ten reasons to exclude viruses from the tree of life. *Nat Rev Microbiol* 7(4):306–311.
22. Tan G, et al. (2015) Current methods for automated filtering of multiple sequence alignments frequently worsen single-Gene phylogenetic inference. *Syst Biol* 64(5):778–791.
23. Lane WJ, Darst SA (2010) Molecular evolution of multisubunit RNA polymerases: sequence analysis. *J Mol Biol* 395(4):671–685.
24. Blombach F, et al. (2009) Identification of an ortholog of the eukaryotic RNA polymerase III subunit RPC34 in Crenarchaeota and Thaumarchaeota suggests specialization of RNA polymerases for coding and non-coding RNAs in Archaea. *Biol Direct* 4(1):39.
25. Blombach F, et al. (2015) Archaeal TFE $\alpha/\beta$  is a hybrid of TFIIE and the RNA polymerase III subcomplex hRPC62/39. *eLife* 4:e08378.
26. Eme L, Spang A, Lombard J, Stairs CW, Ettema TJG (2017) Archaea and the origin of eukaryotes. *Nat Rev Microbiol* 15(12):711–723.
27. Claverie J-M, Abergel C (2013) Open questions about giant viruses. *Advances in Virus Research* (Elsevier), pp 25–56.

28. Claverie J-M, Abergel C (2016) Giant viruses: The difficult breaking of multiple epistemological barriers. *Stud Hist Philos Sci Part C Stud Hist Philos Biol Biomed Sci* 59:89–99.
29. Filée J (2013) Route of NCLDV evolution: the genomic accordion. *Curr Opin Virol* 3(5):595–599.
30. Filée J (2018) Giant viruses and their mobile genetic elements: the molecular symbiosis hypothesis. *Curr Opin Virol* 33:81–88.
31. Forterre P (2006) The origin of viruses and their possible roles in major evolutionary transitions. *Virus Res* 117(1):5–16.
32. Forterre P (2012) Virocell concept, The. *ELS*, ed John Wiley & Sons, Ltd (John Wiley & Sons, Ltd, Chichester, UK). doi:10.1002/9780470015902.a0023264.
33. Legendre M, et al. (2018) Diversity and evolution of the emerging Pandoraviridae family. *Nat Commun* 9(1). doi:10.1038/s41467-018-04698-4.
